# Supplementary material for: The Housekeeping Transporter SLC25A44 Bridges between the Secondary Metabolism and Mitochondrial Electron Transfer Chains
Source: Preprints.org preprint supplement (doi:10.20944/preprints202008.0580.v1), 2020-08-26
Supplement: Supplementary file 1 [file supplementary]

**The housekeeping transporter SLC25A44 bridges between the secondary  
metabolism and mitochondrial electron transfer chains**

**Behrooz Darbani**

The Novo Nordisk Foundation Center for Biosustainability, Technical University of Denmark, Denmark

[behroozdarbani@gmail.com](mailto:behroozdarbani@gmail.com)

[behdas@biosustain.dtu.dk](mailto:behdas@biosustain.dtu.dk)

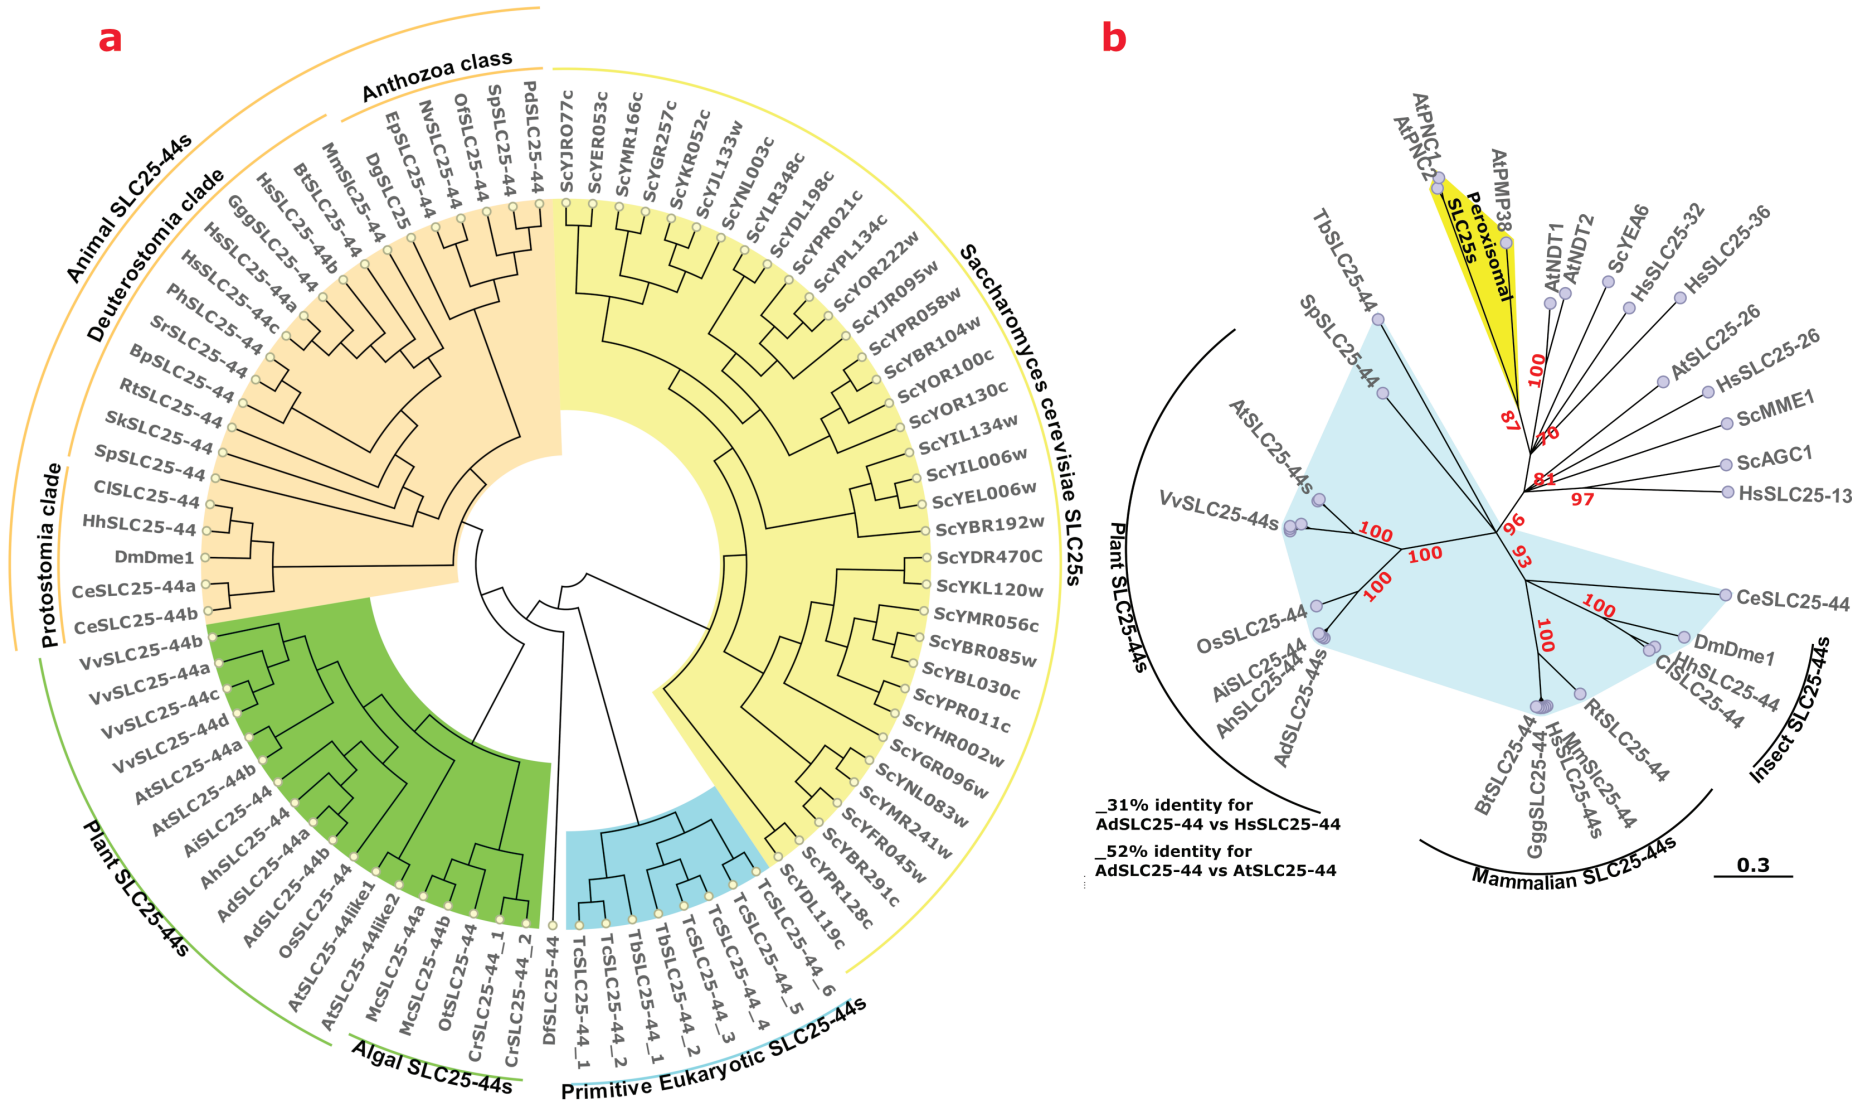

**Extended Data Fig. 1: There is no eukaryotic orthologue for members of SLC25A44 (SLC25-44) in fungi. a**, Members of the SLC25A44 have animal, plant, and primitive eukaryotic specific phylogenetic clusters which are completely different from any member of *S. cerevisiae* SLC25s. **b**, *S. cerevisiae* AGC1, MME1, and YEA6 are the most immediate blast hits for SLC25A44s. **a, b**, The maximum likelihood phylogenetic tree was built on the WAG matrix for amino acid sequences and bootstraps are shown as percentage of 1000. See Extended Data Table 2 for protein sequences.

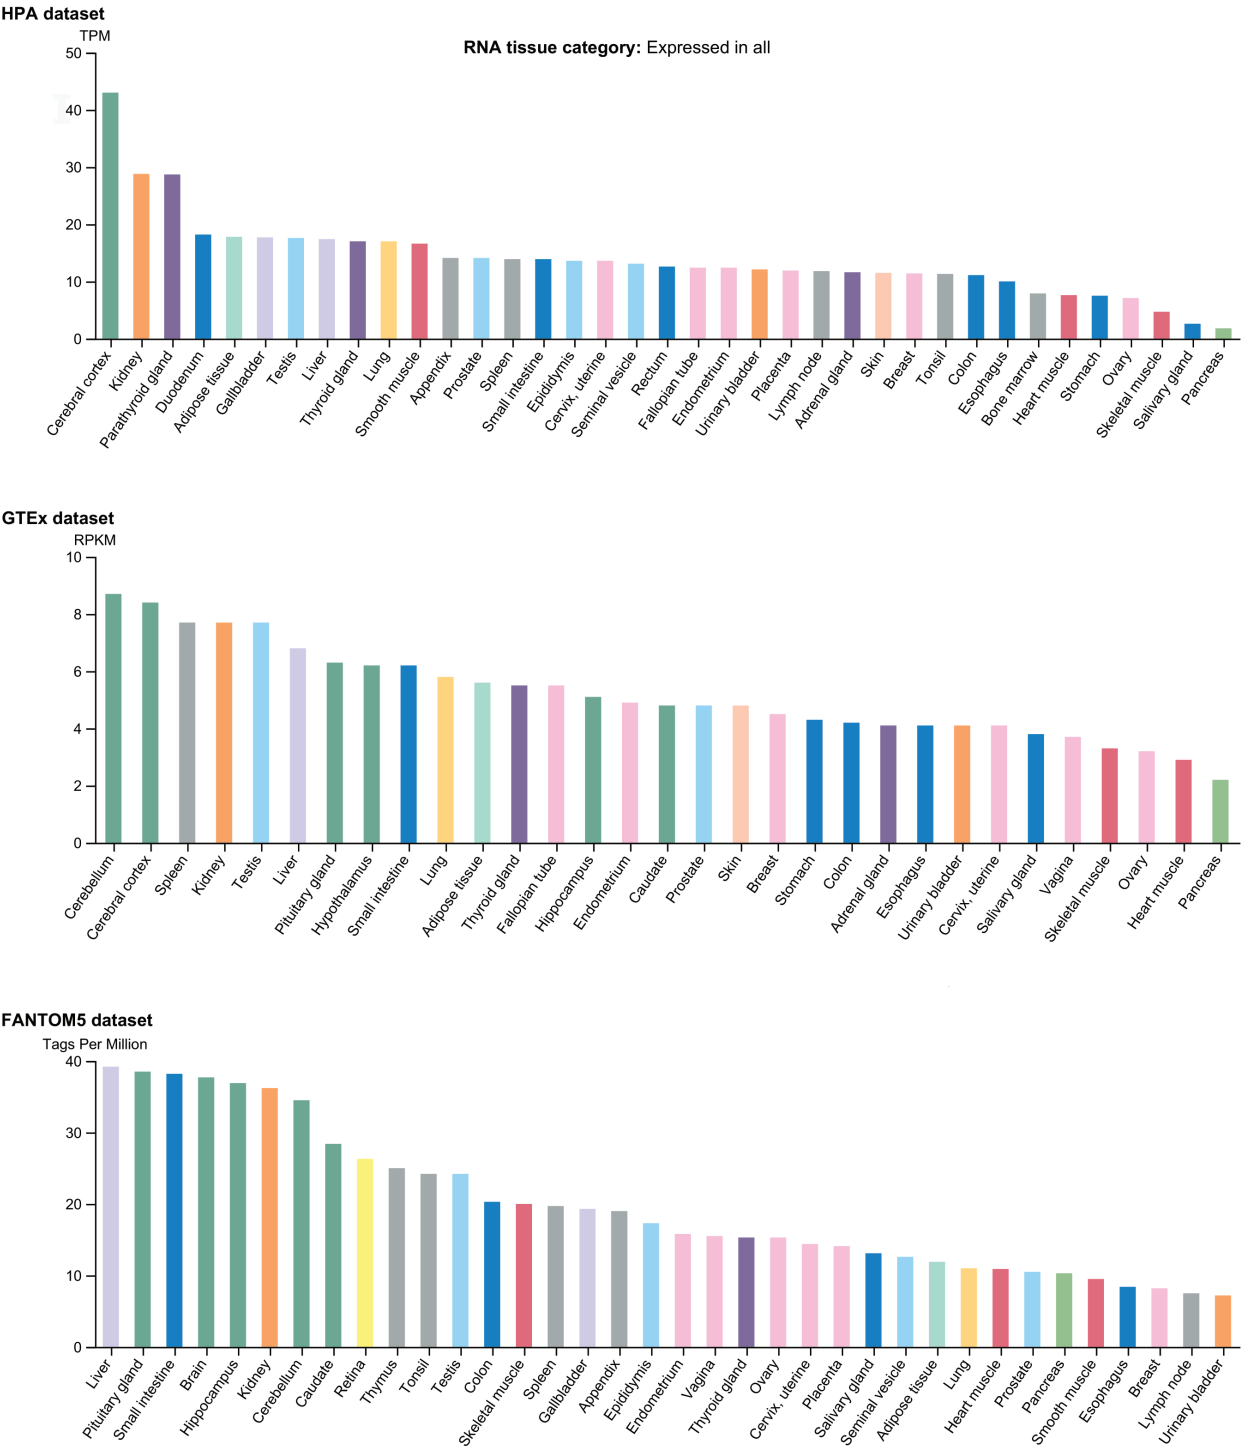

**Extended Data Fig. 2: Transcript levels of *SLC25A44* in human** (From the human protein atlas at <https://www.proteinatlas.org/>; Nat. Biotechnol. 2010, 28:1248-50).

# a, Absolute transcript levels for *AtSlc25A44*

At5g15640 246528\_at

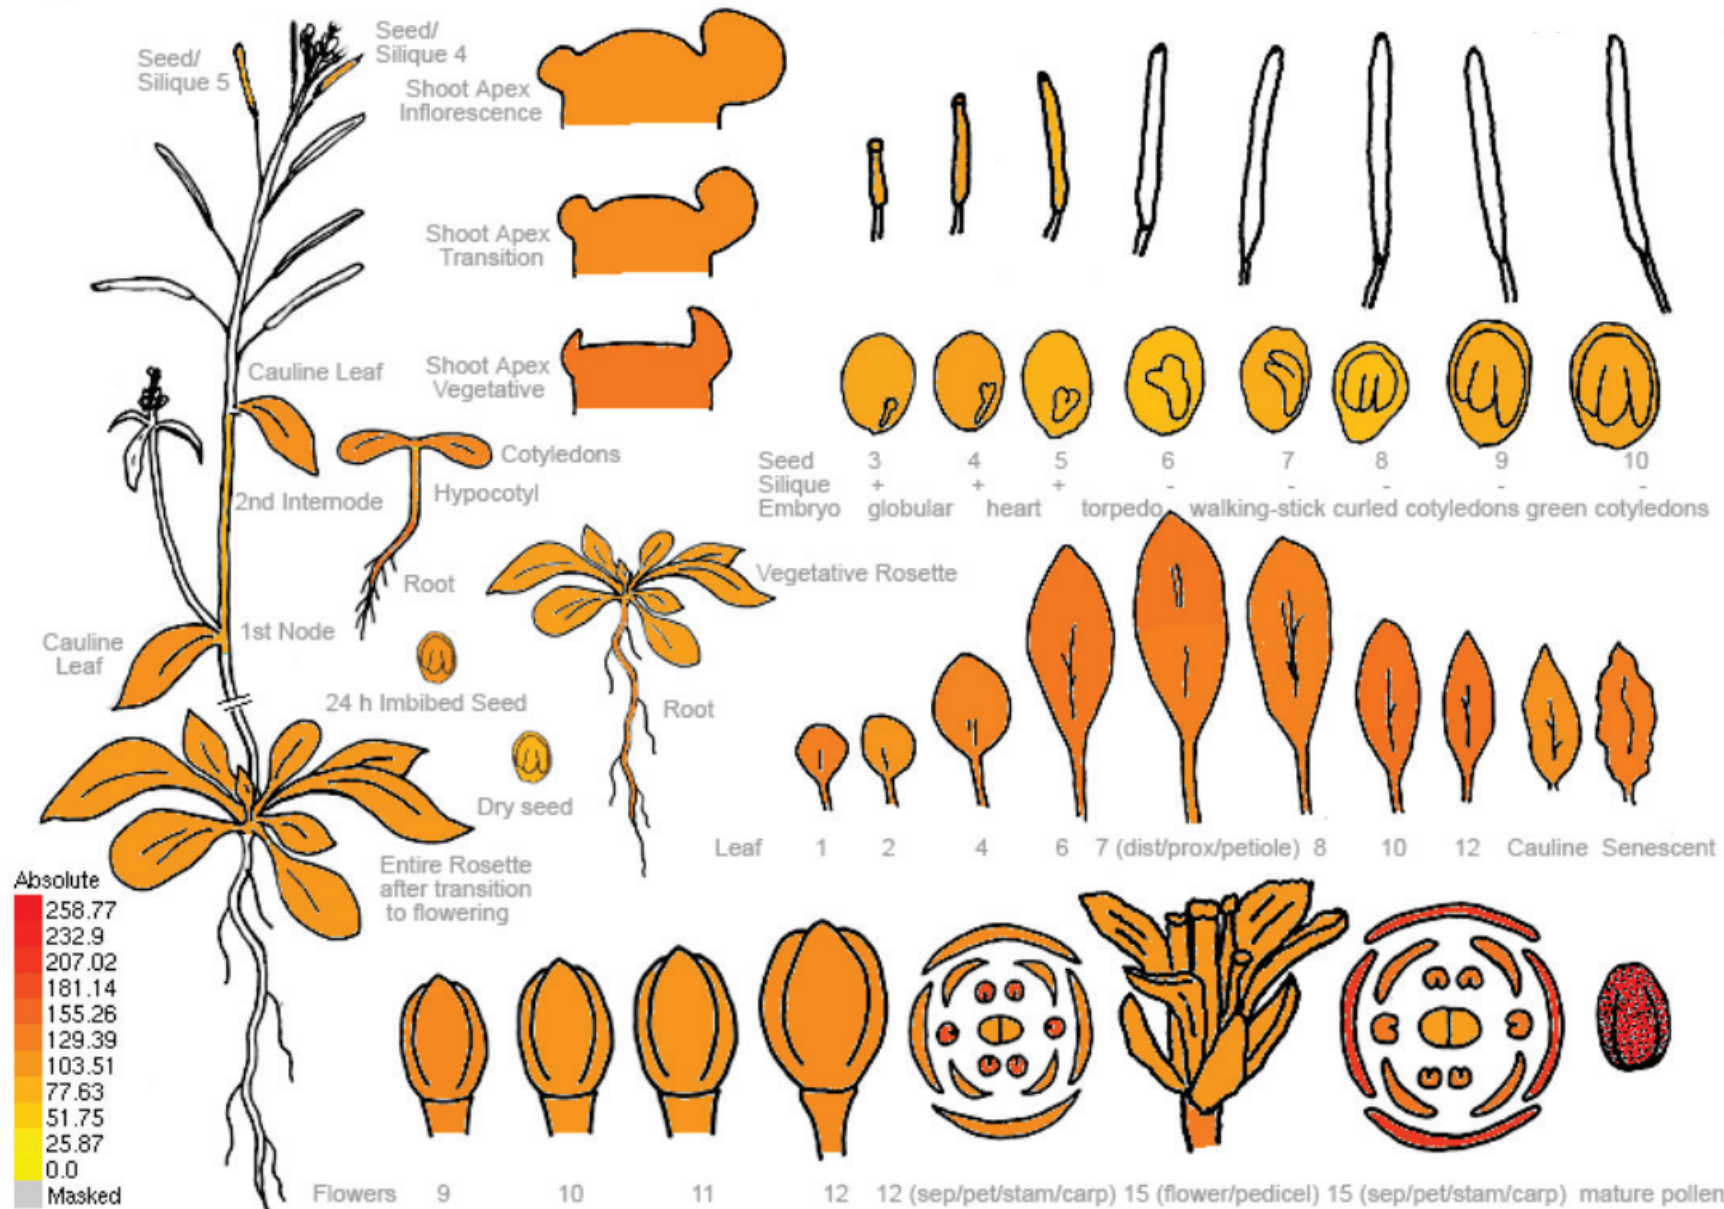

**Extended Data Fig. 3: Constitutive expression of *Arabidopsis thaliana* *Slc25A44*.** a-f, *AtSlc25A44* absolute and relative transcript levels in comparison with the housekeeping genes *Ubc9* and *Gapdh*. At5g15640: *Slc25A44*, At4g27960: *Ubc9*, At1g13440: *Gapdh* (Data from Nat. Genet. 37:501-6). g, *AtSLC25A44* protein levels (Data from Science 320, 938-41).



**b, Hormone treatments**

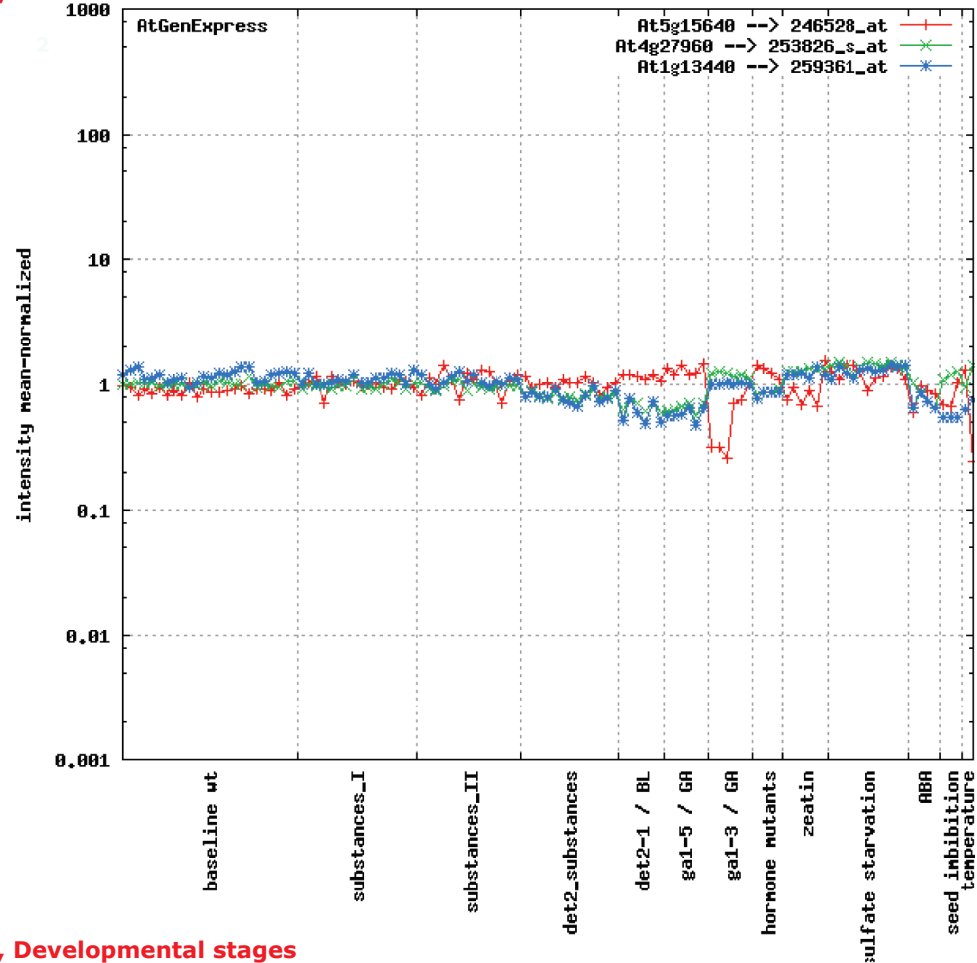

**c, Developmental stages**

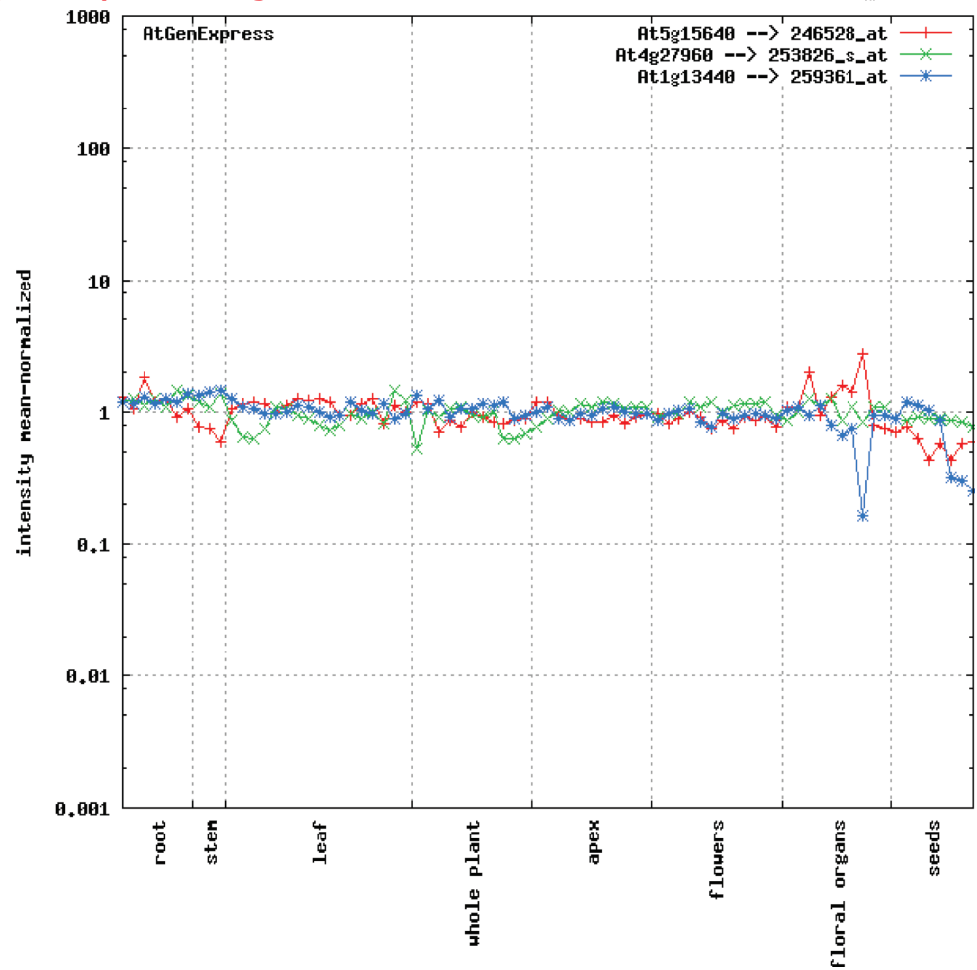

**Extended Data Fig. 3: Constitutive expression of *Arabidopsis thaliana* SLC25A44.** **a-f**, *AtSlc25A44* absolute and relative transcript levels in comparison with the housekeeping genes *Ubc9* and *Gapdh*. At5g15640: *Slc25A44*, At4g27960: *Ubc9*, At1g13440: *Gapdh* (Data from Nat. Genet. 37:501-6). **g**, *AtSLC25A44* protein levels (Data from Science 320, 938-41).

**d, Biotic stress**

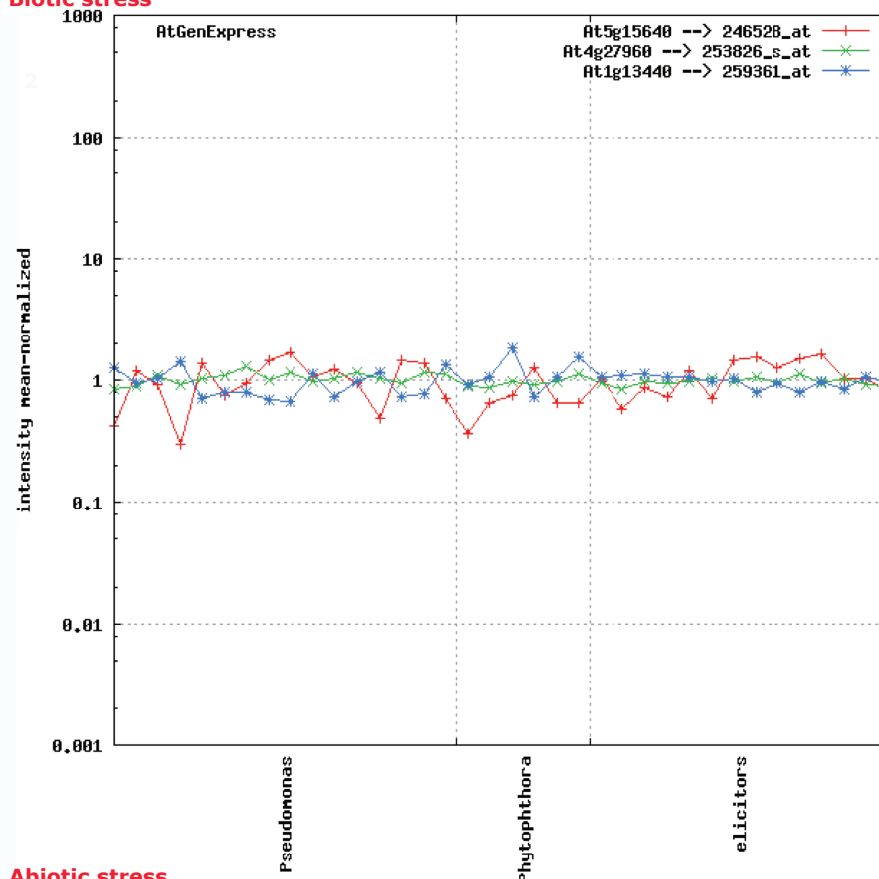

**e, Abiotic stress**

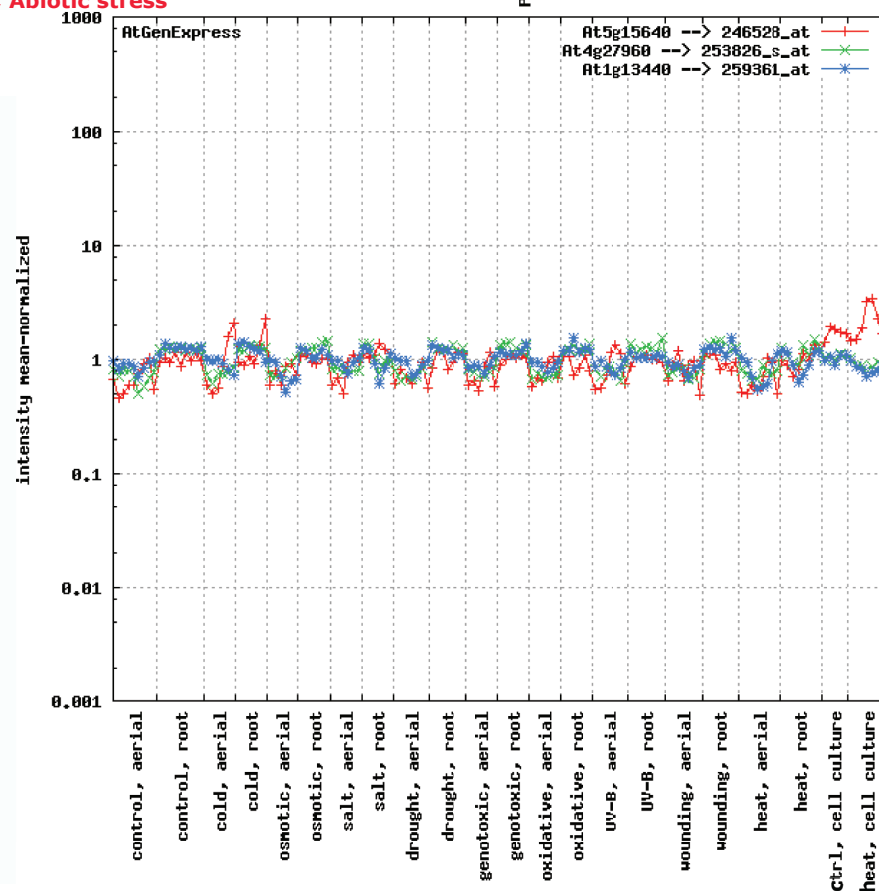

**Extended Data Fig. 3: Constitutive expression of *Arabidopsis thaliana* *Slc25A44*.** **a-f**, *AtSlc25A44* absolute and relative transcript levels in comparison with the housekeeping genes *Ubc9* and *Gapdh*. At5g15640: *Slc25A44*, At4g27960: *Ubc9*, At1g13440: *Gapdh* (Data from Nat. Genet. 37:501-6). **g**, *AtSLC25A44* protein levels (Data from Science 320, 938-41).

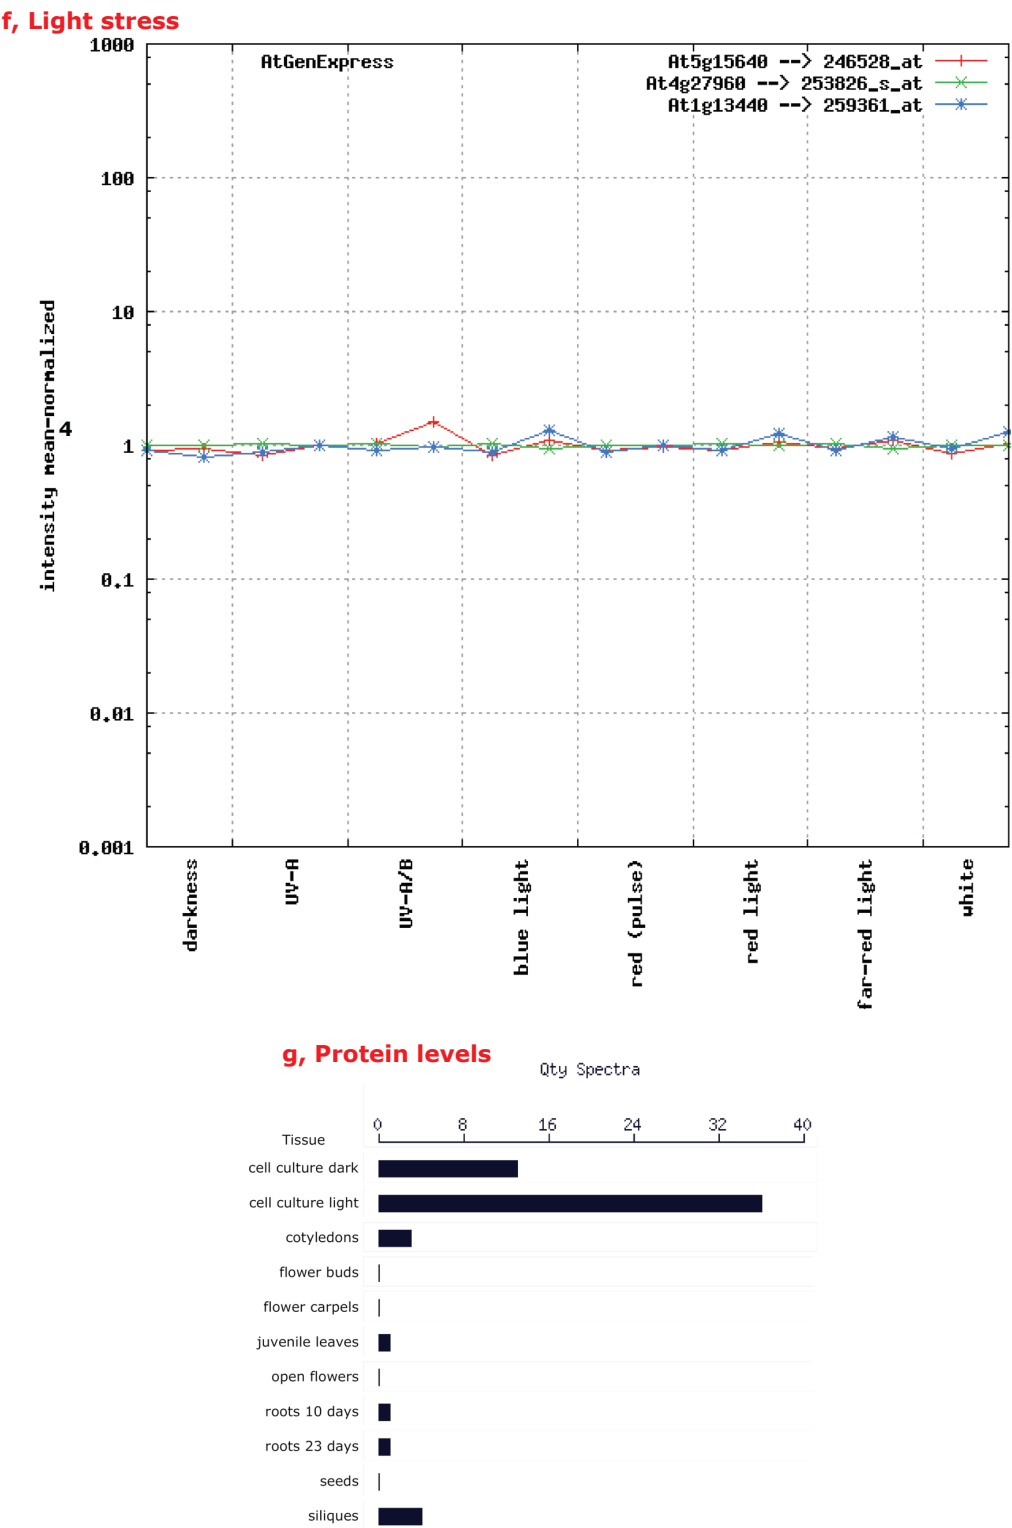

**Extended Data Fig. 3: Constitutive expression of *Arabidopsis thaliana* *Slc25A44*.** **a-f**, *AtSlc25A44* absolute and relative transcript levels in comparison with the housekeeping genes *Ubc9* and *Gapdh*. At5g15640: *Slc25A44*, At4g27960: *Ubc9*, At1g13440: *Gapdh* (Data from Nat. Genet. 37:501-6). **g**, *AtSLC25A44* protein levels (Data from Science 320, 938-41).

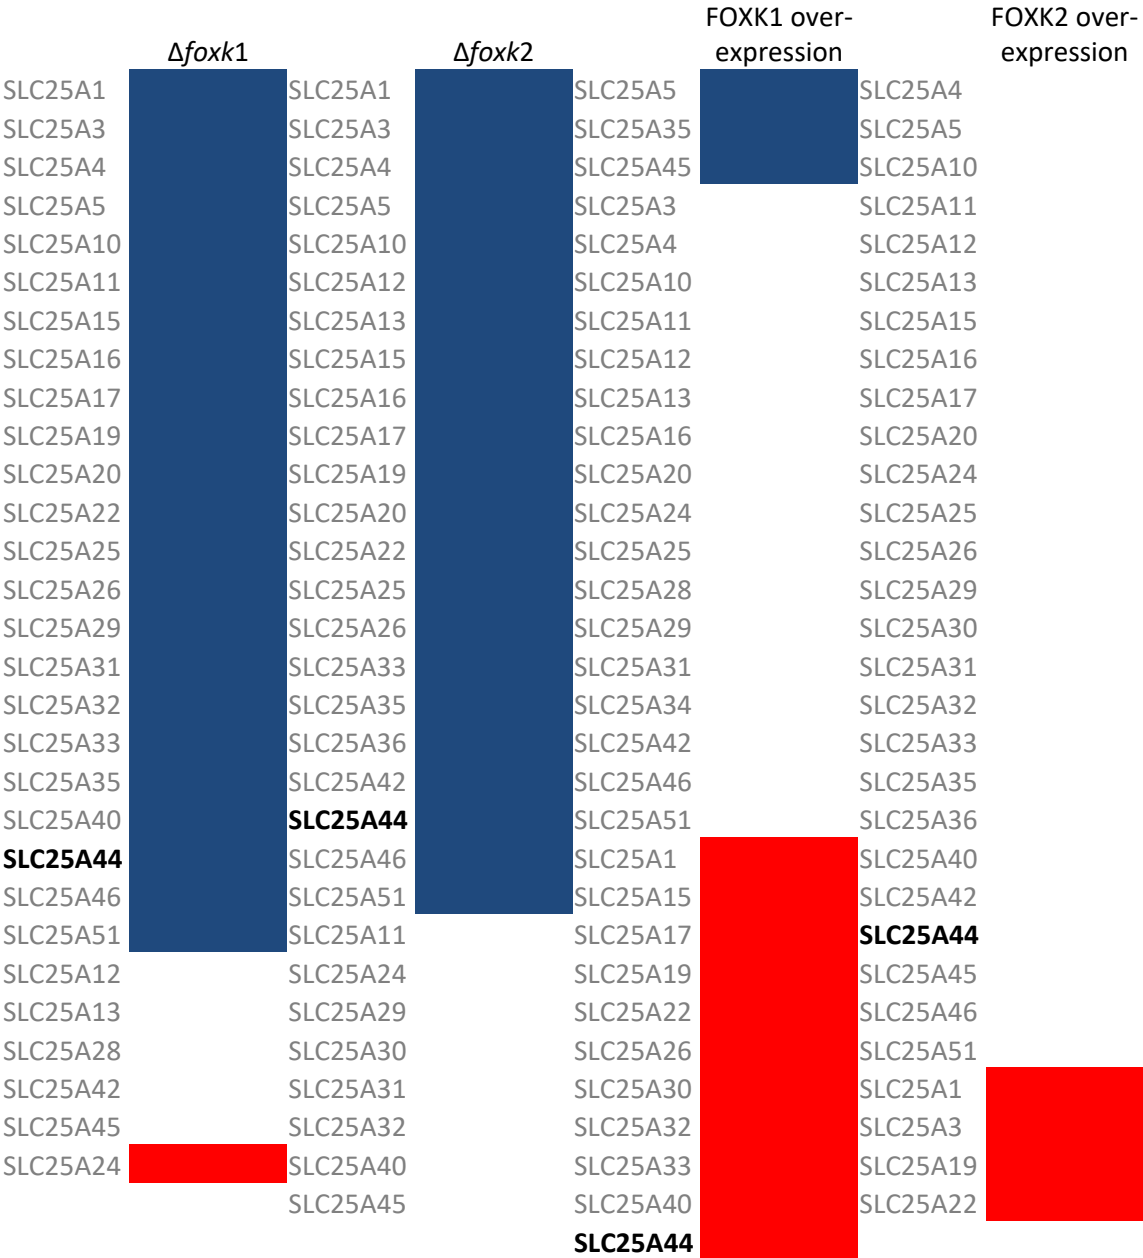

**Extended Data Fig. 4: The effects of FOXK1 and FOXK2 on the cellular levels of SLC25 transporter proteins** (Data from *Nature*, 566:279–83). Blue: downregulation ( $p < 0.05$ ), White: no significant changes, Red: upregulation ( $p < 0.05$ ).

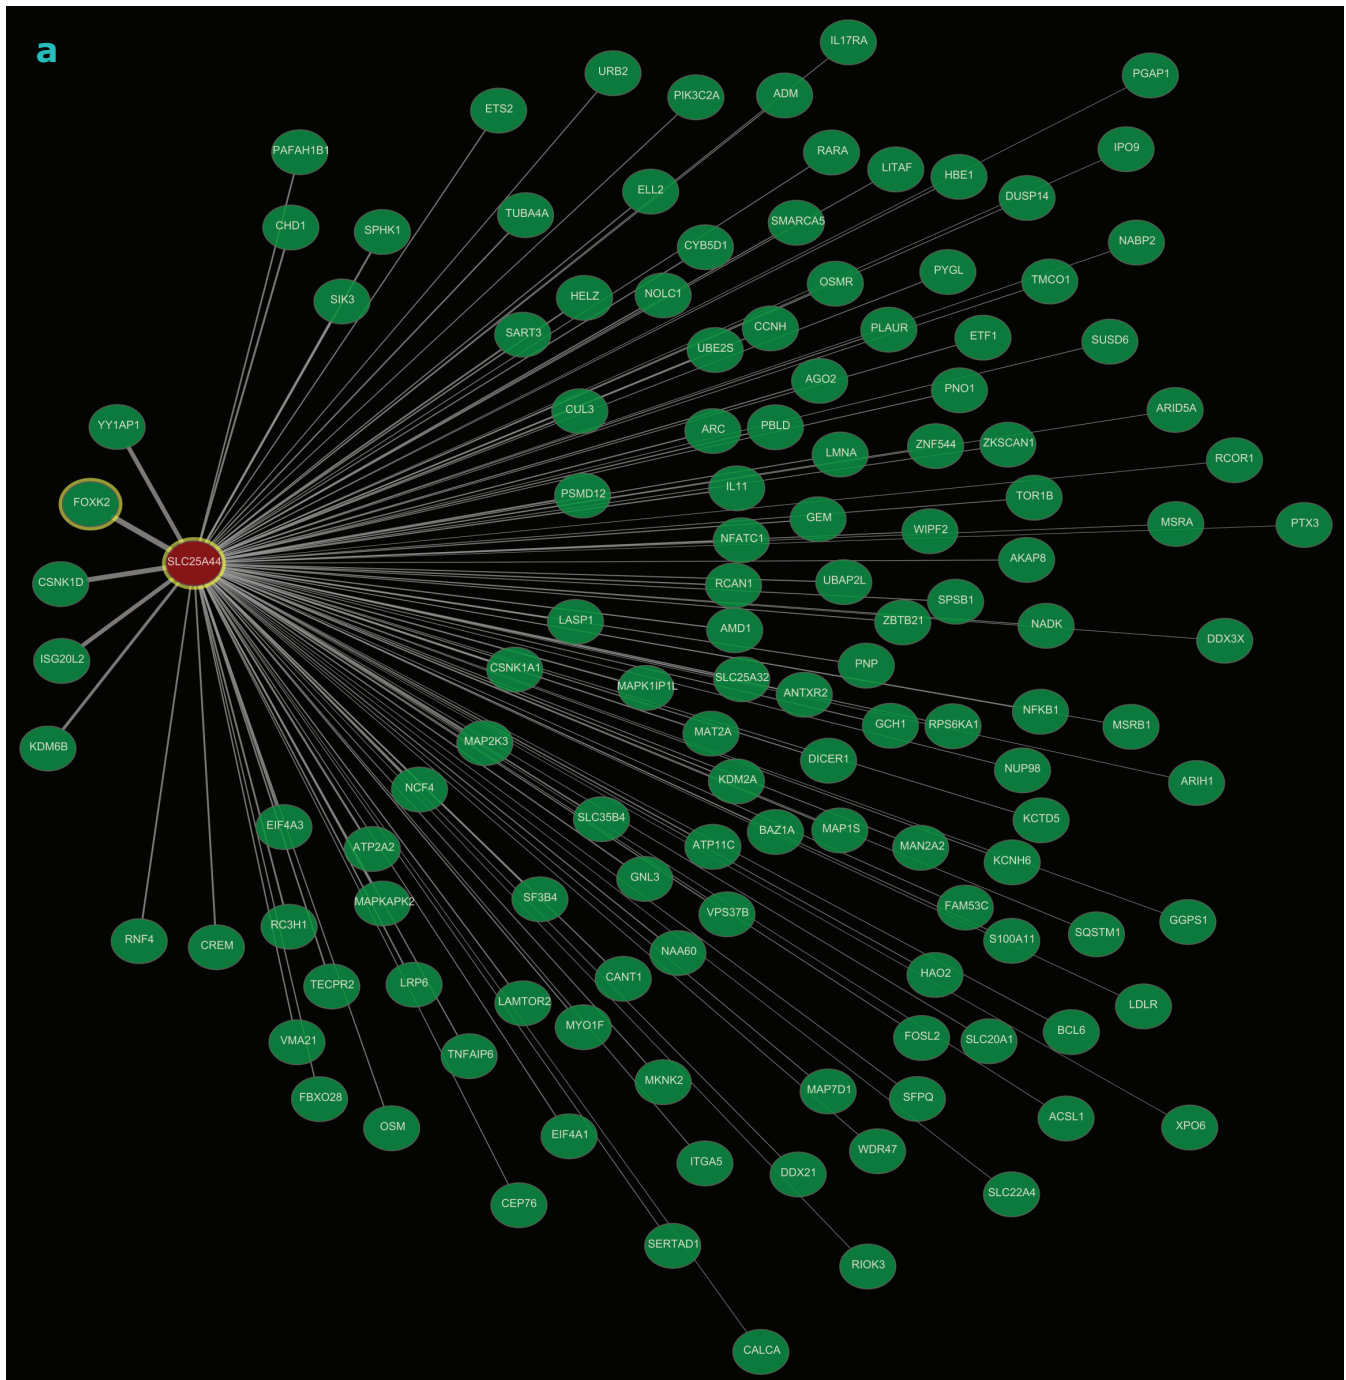

**Extended Data Fig. 5: The *Slc25A44* (a) and *Foxk2* (b) co-expressed genes in human** (Data from Nucleic Acids Res. 45,D389-D396).



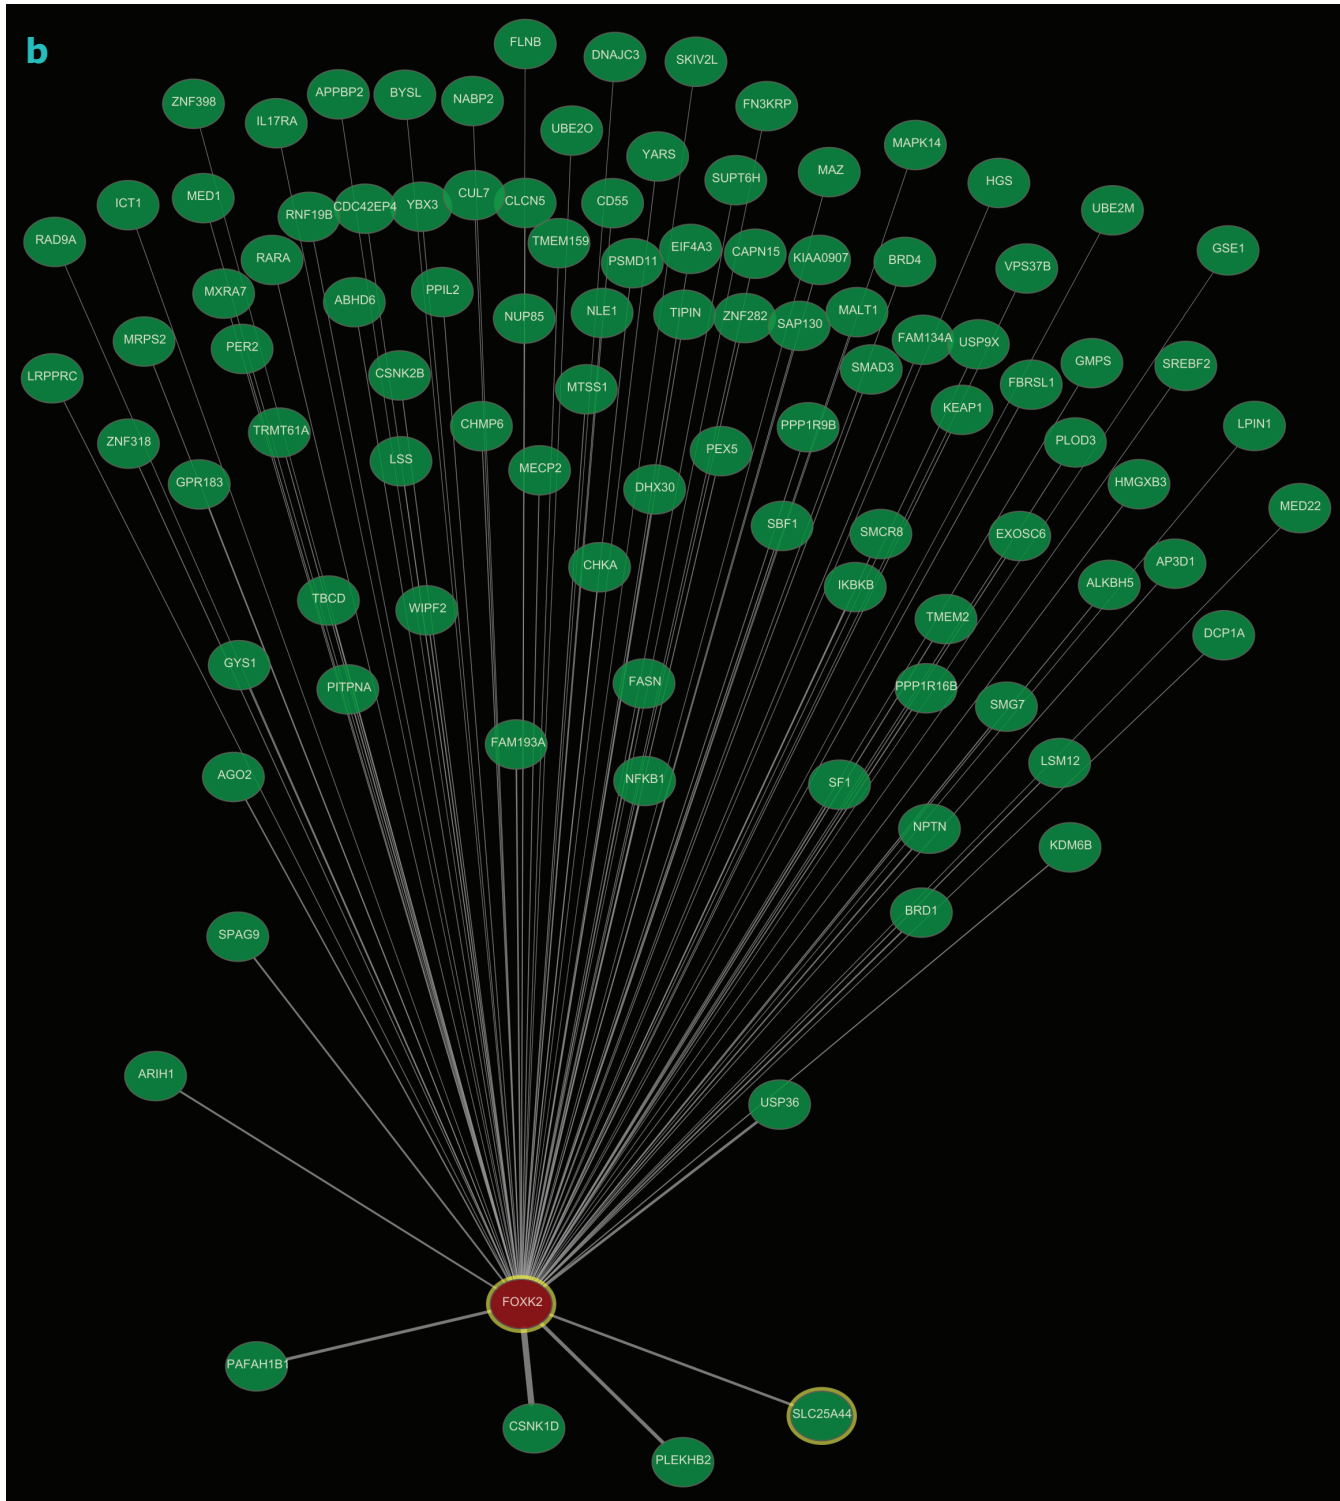

**Extended Data Fig. 5: The *Slc25A44* (a) and *Foxk2* (b) co-expressed genes in human** (Data from Nucleic Acids Res. 45,D389-D396).

**Extended Data Table 1: The *Slc25A44* co-expressed genes**

| <i>Mus musculus</i> |               |                                                                                    |
|---------------------|---------------|------------------------------------------------------------------------------------|
| Gene ID             | Gene Symbol   | Description                                                                        |
| 12908               | Crat          | carnitine acetyltransferase                                                        |
| 67326               | 1700037H04Rik | RIKEN cDNA 1700037H04 gene                                                         |
| 56384               | Letm1         | leucine zipper-EF-hand containing transmembrane protein 1                          |
| 20528               | Slc2a4        | solute carrier family 2 (facilitated glucose transporter), member 4                |
| 108958              | Miga2         | mitoguardin 2                                                                      |
| 28169               | Agpat3        | 1-acylglycerol-3-phosphate O-acyltransferase 3                                     |
| 13430               | Dnm2          | dynamitin 2                                                                        |
| 12686               | Elov3         | elongation of very long chain fatty acids (FEN1/Elo2, SUR4/Elo3, yeast)-like 3     |
| 12974               | Cs            | citrate synthase                                                                   |
| 16890               | Lipe          | lipase, hormone sensitive                                                          |
| 116939              | Pnpla3        | patatin-like phospholipase domain containing 3                                     |
| 23945               | Mgll          | monoglyceride lipase                                                               |
| 15258               | Hipk2         | homeodomain interacting protein kinase 2                                           |
| 66853               | Pnpla2        | patatin-like phospholipase domain containing 2                                     |
| 68465               | Adipor2       | adiponectin receptor 2                                                             |
| 27280               | Phlda3        | pleckstrin homology like domain, family A, member 3                                |
| 330189              | Tmem120b      | transmembrane protein 120B                                                         |
| 67283               | Slc25a19      | solute carrier family 25 (mitochondrial thiamine pyrophosphate carrier), member 19 |
| 11652               | Akt2          | thymoma viral proto-oncogene 2                                                     |
| 235169              | Foxred1       | FAD-dependent oxidoreductase domain containing 1                                   |
| 232370              | Clstn3        | calsyntenin 3                                                                      |
| 102247              | Gpat4         | glycerol-3-phosphate acyltransferase 4                                             |
| 11637               | Ak2           | adenylate kinase 2                                                                 |
| 14245               | Lpin1         | lipin 1                                                                            |
| 170768              | Pfkfb3        | 6-phosphofructo-2-kinase/fructose-2,6-biphosphatase 3                              |
| 11554               | Adrb1         | adrenergic receptor, beta 1                                                        |
| 17308               | Mgat1         | mannoside acetylglucosaminyltransferase 1                                          |
| 76308               | Rab1b         | RAB1B, member RAS oncogene family                                                  |
| 105245              | Txndc5        | thioredoxin domain containing 5                                                    |
| 14555               | Gpd1          | glycerol-3-phosphate dehydrogenase 1 (soluble)                                     |
| 104111              | Adcy3         | adenylate cyclase 3                                                                |
| 20411               | Sorbs1        | sorbin and SH3 domain containing 1                                                 |
| 23921               | Sh2b2         | SH2B adaptor protein 2                                                             |
| 50772               | Mapk6         | mitogen-activated protein kinase 6                                                 |
| 76219               | Arxes1        | adipocyte-related X-chromosome expressed sequence 1                                |
| 21754               | Tesk1         | testis specific protein kinase 1                                                   |
| 97212               | Hadha         | hydroxyacyl-Coenzyme A dehydrogenase, alpha subunit                                |

|        |            |                                                              |
|--------|------------|--------------------------------------------------------------|
| 11640  | Akap1      | A kinase (PRKA) anchor protein 1                             |
| 83679  | Pde4dip    | phosphodiesterase 4D interacting protein (myomegalin)        |
| 73102  | Slc22a23   | solute carrier family 22, member 23                          |
| 71767  | Tysnd1     | trypsin domain containing 1                                  |
| 18633  | Pex16      | peroxisomal biogenesis factor 16                             |
| 76976  | Arxes2     | adipocyte-related X-chromosome expressed sequence 2          |
| 22123  | Psmd3      | proteasome (prosome, macropain) 26S subunit, non-ATPase, 3   |
| 57080  | Gtf2ird1   | general transcription factor II I repeat domain-containing 1 |
| 75483  | Cox8c      | cytochrome c oxidase subunit 8C                              |
| 18534  | Pck1       | phosphoenolpyruvate carboxykinase 1, cytosolic               |
| 63955  | Cables1    | CDK5 and Abl enzyme substrate 1                              |
| 67039  | Rbm25      | RNA binding motif protein 25                                 |
| 12651  | Chkb       | choline kinase beta                                          |
| 14433  | Gapdh      | glyceraldehyde-3-phosphate dehydrogenase                     |
| 11861  | Arl4a      | ADP-ribosylation factor-like 4A                              |
| 71998  | Slc25a35   | solute carrier family 25, member 35                          |
| 66916  | Ndufb7     | NADH:ubiquinone oxidoreductase subunit B7                    |
| 75552  | Paqr9      | progesterone and adiponectin receptor family member IX       |
| 14751  | Gpi1       | glucose phosphate isomerase 1                                |
| 64138  | Ctsz       | cathepsin Z                                                  |
| 53893  | Nudt5      | nudix (nucleoside diphosphate linked moiety X)-type motif 5  |
| 18631  | Pex11a     | peroxisomal biogenesis factor 11 alpha                       |
| 13202  | Ddt        | D-dopachrome tautomerase                                     |
| 73095  | Slc25a42   | solute carrier family 25, member 42                          |
| 101966 | D8Ertd738e | DNA segment, Chr 8, ERATO Doi 738, expressed                 |
| 216134 | Pdxk       | pyridoxal (pyridoxine, vitamin B6) kinase                    |
| 52710  | Slc52a2    | solute carrier protein 52, member 2                          |
| 14291  | Fpr-rs4    | formyl peptide receptor, related sequence 4                  |
| 353172 | Gars       | glycyl-tRNA synthetase                                       |
| 14311  | Cidec      | cell death-inducing DFFA-like effector c                     |
| 72787  | Ndc1       | NDC1 transmembrane nucleoporin                               |
| 103841 | Cuedc1     | CUE domain containing 1                                      |
| 67899  | Cmc1       | COX assembly mitochondrial protein 1                         |
| 18641  | Pfkl       | phosphofructokinase, liver, B-type                           |
| 116746 | Defb6      | defensin beta 6                                              |
| 100705 | Acacb      | acetyl-Coenzyme A carboxylase beta                           |
| 18604  | Pdk2       | pyruvate dehydrogenase kinase, isoenzyme 2                   |
| 235339 | Dlat       | dihydrolipoamide S-acetyltransferase                         |
| 104816 | Aspg       | asparaginase                                                 |
| 22245  | Uck1       | uridine-cytidine kinase 1                                    |
| 11518  | Add1       | adducin 1 (alpha)                                            |

|        |          |                                                                           |
|--------|----------|---------------------------------------------------------------------------|
| 56332  | Amotl2   | angiomotin-like 2                                                         |
| 66973  | Mrps18b  | mitochondrial ribosomal protein S18B                                      |
| 67384  | Bag4     | BCL2-associated athanogene 4                                              |
| 11302  | Aatk     | apoptosis-associated tyrosine kinase                                      |
| 67477  | Abhd15   | abhydrolase domain containing 15                                          |
| 11832  | Aqp7     | aquaporin 7                                                               |
| 212862 | Chpt1    | choline phosphotransferase 1                                              |
| 66168  | Grina    | glutamate receptor, ionotropic, N-methyl D-aspartate-associated protein 1 |
| 14081  | Acs1     | acyl-CoA synthetase long-chain family member 1                            |
| 228966 | Ppp1r3d  | protein phosphatase 1, regulatory subunit 3D                              |
| 97998  | Deptor   | DEP domain containing MTOR-interacting protein                            |
| 268291 | Rnf217   | ring finger protein 217                                                   |
| 110095 | Pygl     | liver glycogen phosphorylase                                              |
| 116701 | Fgfr1    | fibroblast growth factor receptor-like 1                                  |
| 26940  | Ecsit    | ECSIT signalling integrator                                               |
| 18754  | Prkce    | protein kinase C, epsilon                                                 |
| 67883  | Uxs1     | UDP-glucuronate decarboxylase 1                                           |
| 12234  | Btrc     | beta-transducin repeat containing protein                                 |
| 75678  | Ippk     | inositol 1,3,4,5,6-pentakisphosphate 2-kinase                             |
| 66477  | Atp5md   | ATP synthase membrane subunit DAPIT                                       |
| 16527  | Kcnk3    | potassium channel, subfamily K, member 3                                  |
| 110935 | Atp6v1b1 | ATPase, H <sup>+</sup> transporting, lysosomal V1 subunit B1              |
| 18071  | Nhlh1    | nescient helix loop helix 1                                               |
| 14792  | Lpcat3   | lysophosphatidylcholine acyltransferase 3                                 |
| 16828  | Ldha     | lactate dehydrogenase A                                                   |
| 11980  | Atp8a1   | ATPase, aminophospholipid transporter (APLT), class I, type 8A, member 1  |
| 16500  | Kcnb1    | potassium voltage gated channel, Shab-related subfamily, member 1         |
| 217869 | Eif5     | eukaryotic translation initiation factor 5                                |
| 241556 | Tspan18  | tetraspanin 18                                                            |
| 329910 | Acot11   | acyl-CoA thioesterase 11                                                  |
| 78653  | BolA3    | bolA-like 3 (E. coli)                                                     |
| 20514  | Slc1a5   | solute carrier family 1 (neutral amino acid transporter), member 5        |
| 18746  | Pkm      | pyruvate kinase, muscle                                                   |
| 654795 | Sdr39u1  | short chain dehydrogenase/reductase family 39U, member 1                  |
| 228998 | Arfgap1  | ADP-ribosylation factor GTPase activating protein 1                       |
| 15587  | Hyal2    | hyaluronoglucosaminidase 2                                                |
| 228359 | Arhgap1  | Rho GTPase activating protein 1                                           |
| 78286  | Nav2     | neuron navigator 2                                                        |
| 27362  | Dnajb9   | DnaJ heat shock protein family (Hsp40) member B9                          |
| 56535  | Pex3     | peroxisomal biogenesis factor 3                                           |
| 26457  | Slc27a1  | solute carrier family 27 (fatty acid transporter), member 1               |

|        |         |                                                                                       |
|--------|---------|---------------------------------------------------------------------------------------|
| 67382  | Brd3    | bromodomain containing 3                                                              |
| 624219 | Angptl8 | angiopoietin-like 8                                                                   |
| 12846  | Comt    | catechol-O-methyltransferase                                                          |
| 12041  | Bckdk   | branched chain ketoacid dehydrogenase kinase                                          |
| 13177  | Eci1    | enoyl-Coenzyme A delta isomerase 1                                                    |
| 50785  | Hs6st1  | heparan sulfate 6-O-sulfotransferase 1                                                |
| 13850  | Ephx2   | epoxide hydrolase 2, cytoplasmic                                                      |
| 72077  | Gcnt3   | glucosaminyl (N-acetyl) transferase 3, mucin type                                     |
| 17480  | Mpl     | myeloproliferative leukemia virus oncogene                                            |
| 21379  | Tbrg4   | transforming growth factor beta regulated gene 4                                      |
| 22294  | Uxt     | ubiquitously expressed prefoldin like chaperone                                       |
| 20481  | Ski     | ski sarcoma viral oncogene homolog (avian)                                            |
| 21835  | Thrsp   | thyroid hormone responsive                                                            |
| 76355  | Tgds    | TDP-glucose 4,6-dehydratase                                                           |
| 67900  | Mtfp1   | mitochondrial fission process 1                                                       |
| 105670 | Rcbtb2  | regulator of chromosome condensation (RCC1) and BTB (POZ) domain containing protein 2 |
| 77037  | Mrap    | melanocortin 2 receptor accessory protein                                             |
| 224116 | Muc20   | mucin 20                                                                              |
| 227697 | Dolk    | dolichol kinase                                                                       |
| 22418  | Wnt5a   | wingless-type MMTV integration site family, member 5A                                 |
| 18127  | Nos3    | nitric oxide synthase 3, endothelial cell                                             |
| 13593  | Ebf3    | early B cell factor 3                                                                 |
| 20351  | Sema4a  | sema domain, immunoglobulin domain (Ig),semaphorin 4A                                 |
| 100163 | Pafah2  | platelet-activating factor acetylhydrolase 2                                          |
| 237781 | Mief2   | mitochondrial elongation factor 2                                                     |
| 218639 | Arl15   | ADP-ribosylation factor-like 15                                                       |
| 83961  | Nrg4    | neuregulin 4                                                                          |
| 66459  | Pyurf   | Pigy upstream reading frame                                                           |
| 75735  | Pank1   | pantothenate kinase 1                                                                 |
| 66892  | Eif4e3  | eukaryotic translation initiation factor 4E member 3                                  |
| 101631 | Pwwp2b  | PWWP domain containing 2B                                                             |
| 20743  | Sptbn2  | spectrin beta, non-erythrocytic 2                                                     |
| 17287  | Mep1a   | meprin 1 alpha                                                                        |
| 13358  | Slc25a1 | solute carrier family 25 (mitochondrial carrier, citrate transporter), member 1       |
| 68202  | Ndufa5  | NADH:ubiquinone oxidoreductase subunit A5                                             |
| 27049  | Etv3    | ets variant 3                                                                         |
| 19294  | Nectin2 | nectin cell adhesion molecule 2                                                       |
| 319518 | Pdpr    | pyruvate dehydrogenase phosphatase regulatory subunit                                 |
| 66855  | Tcf25   | transcription factor 25 (basic helix-loop-helix)                                      |
| 56044  | Rala    | v-ral simian leukemia viral oncogene A (ras related)                                  |
| 50768  | Dlc1    | deleted in liver cancer 1                                                             |



|        |               |                                                                                  |
|--------|---------------|----------------------------------------------------------------------------------|
| 30853  | Mlf2          | myeloid leukemia factor 2                                                        |
| 12733  | Clcnka        | chloride channel, voltage-sensitive Ka                                           |
| 69662  | 2310061I04Rik | RIKEN cDNA 2310061I04 gene                                                       |
| 66414  | Ndufa12       | NADH:ubiquinone oxidoreductase subunit A12                                       |
| 67333  | Stk35         | serine/threonine kinase 35                                                       |
| 22378  | Wbp2          | WW domain binding protein 2                                                      |
| 27393  | Mrpl39        | mitochondrial ribosomal protein L39                                              |
| 74549  | Mau2          | MAU2 sister chromatid cohesion factor                                            |
| 20600  | Smr2          | submaxillary gland androgen regulated protein 2                                  |
| 24108  | Ubd           | ubiquitin D                                                                      |
| 16322  | Inha          | inhibin alpha                                                                    |
| 67026  | Thap4         | THAP domain containing 4                                                         |
| 78894  | Aacs          | acetoacetyl-CoA synthetase                                                       |
| 19299  | Abcd3         | ATP-binding cassette, sub-family D (ALD), member 3                               |
| 225887 | Ndufs8        | NADH:ubiquinone oxidoreductase core subunit S8                                   |
| 75104  | Mmd2          | monocyte to macrophage differentiation-associated 2                              |
| 17187  | Max           | Max protein                                                                      |
| 72739  | Zkscan3       | zinc finger with KRAB and SCAN domains 3                                         |
| 94044  | Bcl2l13       | BCL2-like 13 (apoptosis facilitator)                                             |
| 269275 | Acvr1c        | activin A receptor, type IC                                                      |
| 170826 | Ppargc1b      | peroxisome proliferative activated receptor, gamma, coactivator 1 beta           |
| 17261  | Mef2d         | myocyte enhancer factor 2D                                                       |
| 22228  | Ucp2          | uncoupling protein 2 (mitochondrial, proton carrier)                             |
| 21351  | Taldo1        | transaldolase 1                                                                  |
| 192970 | Dhrs11        | dehydrogenase/reductase (SDR family) member 11                                   |
| 20965  | Syn2          | synapsin II                                                                      |
| 78920  | Dlst          | dihydrolipoamide S-succinyltransferase (E2 component of 2-oxo-glutarate complex) |
| 67389  | C1qtnf12      | C1q and tumor necrosis factor related 12                                         |
| 192195 | Ash1l         | ASH1 like histone lysine methyltransferase                                       |
| 68778  | Gucd1         | guanylyl cyclase domain containing 1                                             |
| 223917 | Krt79         | keratin 79                                                                       |
| 20286  | Zc3h7b        | zinc finger CCCH type containing 7B                                              |
| 68614  | Letmd1        | LETM1 domain containing 1                                                        |
| 23882  | Gadd45g       | growth arrest and DNA-damage-inducible 45 gamma                                  |
| 26358  | Aldh1a7       | aldehyde dehydrogenase family 1, subfamily A7                                    |
| 103844 | Inca1         | inhibitor of CDK, cyclin A1 interacting protein 1                                |
| 22670  | Trim26        | tripartite motif-containing 26                                                   |
| 94249  | Slc24a3       | solute carrier family 24 (sodium/potassium/calcium exchanger), member 3          |
| 227731 | Slc25a25      | solute carrier family 25 (mitochondrial carrier, phosphate carrier), member 25   |
| 14227  | Fkbp2         | FK506 binding protein 2                                                          |
| 22272  | Uqcrcq        | ubiquinol-cytochrome c reductase, complex III subunit VII                        |

|        |               |                                                                                |
|--------|---------------|--------------------------------------------------------------------------------|
| 67373  | 2210010C04Rik | RIKEN cDNA 2210010C04 gene                                                     |
| 11519  | Add2          | adducin 2 (beta)                                                               |
| 76585  | Lce1i         | late cornified envelope 1l                                                     |
| 14050  | Eya3          | EYA transcriptional coactivator and phosphatase 3                              |
| 76282  | Gpt           | glutamic pyruvic transaminase, soluble                                         |
| 26446  | Psmb3         | proteasome (prosome, macropain) subunit, beta type 3                           |
| 18293  | Ogdh          | oxoglutarate (alpha-ketoglutarate) dehydrogenase (lipoamide)                   |
| 80912  | Pum1          | pumilio RNA-binding family member 1                                            |
| 22375  | Wars          | tryptophanyl-tRNA synthetase                                                   |
| 72475  | Ssbp3         | single-stranded DNA binding protein 3                                          |
| 67062  | Slc25a53      | solute carrier family 25, member 53                                            |
| 67811  | Poldip2       | polymerase (DNA-directed), delta interacting protein 2                         |
| 18555  | Cdk16         | cyclin-dependent kinase 16                                                     |
| 14936  | Gys1          | glycogen synthase 1, muscle                                                    |
| 211548 | Nomo1         | nodal modulator 1                                                              |
| 18628  | Per3          | period circadian clock 3                                                       |
| 27425  | Atp5l         | ATP synthase, H <sup>+</sup> transporting, mitochondrial F0 complex, subunit G |
| 68385  | Tlcd1         | TLC domain containing 1                                                        |
| 66530  | Ubxn6         | UBX domain protein 6                                                           |
| 216161 | Sbno2         | strawberry notch 2                                                             |
| 14571  | Gpd2          | glycerol phosphate dehydrogenase 2, mitochondrial                              |
| 269642 | Nat8l         | N-acetyltransferase 8-like                                                     |
| 19013  | Ppara         | peroxisome proliferator activated receptor alpha                               |
| 67512  | Agpat2        | 1-acylglycerol-3-phosphate O-acyltransferase 2                                 |
| 110826 | Etfb          | electron transferring flavoprotein, beta polypeptide                           |
| 20768  | Sephs2        | selenophosphate synthetase 2                                                   |
| 230082 | Nol6          | nucleolar protein family 6 (RNA-associated)                                    |
| 320265 | Tafa1         | TAFA chemokine like family member 1                                            |
| 212933 | Pm20d1        | peptidase M20 domain containing 1                                              |
| 74148  | Cluh          | clustered mitochondria (cluA/CLU1) homolog                                     |
| 26922  | Mecr          | mitochondrial trans-2-enoyl-CoA reductase                                      |
| 20732  | Spint1        | serine protease inhibitor, Kunitz type 1                                       |
| 67311  | Nanp          | N-acetylneuraminic acid phosphatase                                            |
| 67231  | Tbc1d20       | TBC1 domain family, member 20                                                  |
| 14261  | Fmo1          | flavin containing monooxygenase 1                                              |
| 69596  | Ap5s1         | adaptor-related protein 5 complex, sigma 1 subunit                             |
| 57316  | C1d           | C1D nuclear receptor co-repressor                                              |
| 67809  | Rmdn3         | regulator of microtubule dynamics 3                                            |
| 14674  | Gna13         | guanine nucleotide binding protein, alpha 13                                   |
| 14071  | F9            | coagulation factor IX                                                          |
| 117160 | Ttyh2         | tweety family member 2                                                         |

|        |        |                                         |
|--------|--------|-----------------------------------------|
| 98845  | Eps8l2 | EPS8-like 2                             |
| 112405 | Egl-1  | egl-9 family hypoxia-inducible factor 1 |
| 19298  | Pex19  | peroxisomal biogenesis factor 19        |
| 67469  | Abhd5  | abhydrolase domain containing 5         |
| 233890 | Zfp768 | zinc finger protein 768                 |

***Arabidopsis thaliana***

| Gene ID  | Gene Symbol | Description                                                               |
|----------|-------------|---------------------------------------------------------------------------|
| 831418   | AT5G15640   | Mitochondrial substrate carrier family protein                            |
| 837196   | AT1G06840   | Leucine-rich repeat protein kinase family protein                         |
| 816321   | AT2G18090   | PHD finger family protein / SWIB complex BAF60b domain-containing protein |
| 821198   | AT3G02880   | Leucine-rich repeat protein kinase family protein                         |
| 831854   | AT5G03380   | Heavy metal transport/detoxification superfamily protein                  |
| 816040   | UGT73B5     | UDP-glucosyl transferase 73B5                                             |
| 818371   | AtIPCS2     | Inositol phosphorylceramide synthase 2                                    |
| 838420   | AT1G18390   | Serine/Threonine kinase family catalytic domain protein                   |
| 842275   | ALA3        | aminophospholipid ATPase 3                                                |
| 815850   | GONST1      | golgi nucleotide sugar transporter 1                                      |
| 838707   | IGMT3       | O-methyltransferase family protein                                        |
| 834206   | AT5G42010   | Transducin/WD40 repeat-like superfamily protein                           |
| 829480   | BAK1        | BR1-associated receptor kinase                                            |
| 10723117 | AT5G62865   | hypothetical protein                                                      |
| 822474   | AT3G28450   | Leucine-rich repeat protein kinase family protein                         |
| 842043   | SERAT2;1    | serine acetyltransferase 2;1                                              |
| 836655   | AT5G65300   | hypothetical protein                                                      |
| 844033   | AT1G76970   | Target of Myb protein 1                                                   |
| 819274   | AT2G46620   | P-loop containing nucleoside triphosphate hydrolases superfamily protein  |
| 843708   | EIL3        | ETHYLENE-INSENSITIVE3-like 3                                              |
| 831070   | AT5G11970   | ABC family ABC transporter, putative (DUF3511)                            |
| 832672   | FC1         | ferrochelataase 1                                                         |
| 831778   | AT5G03610   | GDSL-like Lipase/Acylhydrolase superfamily protein                        |
| 837711   | AT1G11670   | MATE efflux family protein                                                |
| 838501   | JAZ1        | jasmonate-zim-domain protein 1                                            |
| 829597   | AGB1        | GTP binding protein beta 1                                                |
| 836335   | AT5G62150   | peptidoglycan-binding LysM domain-containing protein                      |
| 818237   | AT2G36650   | CHUP1-like protein                                                        |
| 817754   | CNX2        | cofactor of nitrate reductase and xanthine dehydrogenase 2                |
| 828446   | AT4G23470   | PLAC8 family protein                                                      |
| 835595   | AT5G55040   | DNA-binding bromodomain-containing protein                                |
| 828606   | AT4G25030   | Serine/Threonine-kinase                                                   |
| 842485   | AT1G61890   | MATE efflux family protein                                                |
| 837235   | UGT71C5     | UDP-glucosyl transferase 71C5                                             |

|        |           |                                                                            |
|--------|-----------|----------------------------------------------------------------------------|
| 820192 | AT3G10300 | Calcium-binding EF-hand family protein                                     |
| 819724 | TOPP9     | Calcineurin-like metallo-phosphoesterase superfamily protein               |
| 822517 | AT3G28850 | Glutaredoxin family protein                                                |
| 832326 | ADT5      | arogenate dehydratase 5                                                    |
| 816336 | AT2G18210 | hypothetical protein                                                       |
| 819811 | NHX4      | sodium hydrogen exchanger 4                                                |
| 824037 | AT3G48760 | DHHC-type zinc finger family protein                                       |
| 839722 | AT1G28280 | VQ motif-containing protein                                                |
| 836497 | DGK2      | diacylglycerol kinase 2                                                    |
| 817197 | PLA2A     | phospholipase A 2A                                                         |
| 836499 | NAC102    | NAC domain containing protein 102                                          |
| 832966 | AT5G28630 | glycine-rich protein                                                       |
| 838305 | AT1G17340 | Phosphoinositide phosphatase family protein                                |
| 839085 | AT1G24807 | Glutamine amidotransferase type 1 family protein                           |
| 842285 | AT1G59910 | Actin-binding FH2 (formin homology 2) family protein                       |
| 833862 | AT5G38710 | Methylenetetrahydrofolate reductase family protein                         |
| 843026 | AT1G67060 | peptidase M50B-like protein                                                |
| 815625 | CRCK3     | calmodulin-binding receptor-like cytoplasmic kinase 3                      |
| 818140 | PGSIP7    | Nucleotide-diphospho-sugar transferases superfamily protein                |
| 818166 | PUB23     | plant U-box 23                                                             |
| 822252 | AT3G26470 | Powdery mildew resistance protein, RPW8 domain-containing protein          |
| 836068 | AT5G59490 | Haloacid dehalogenase-like hydrolase (HAD) superfamily protein             |
| 832960 | AT5G28610 | LOW protein: ATP-dependent RNA helicase DRS1-like protein                  |
| 824410 | PUB22     | plant U-box 22                                                             |
| 829129 | AT4G30060 | Core-2/I-branching beta-1,6-N-acetylglucosaminyltransferase family protein |
| 831109 | AT5G12340 | DUF4228 domain protein                                                     |
| 826791 | PLDGAMMA1 | phospholipase D gamma 1                                                    |
| 843936 | CPK29     | calcium-dependent protein kinase 29                                        |
| 825135 | AT3G59660 | C2 domain-containing protein / GRAM domain-containing protein              |
| 839423 | AT1G03740 | Protein kinase superfamily protein                                         |
| 828542 | CIPK8     | CBL-interacting protein kinase 8                                           |
| 829144 | ATR2      | P450 reductase 2                                                           |
| 827831 | AT4G20830 | FAD-binding Berberine family protein                                       |
| 837415 | AT1G08940 | Phosphoglycerate mutase family protein                                     |
| 836638 | TPPJ      | Haloacid dehalogenase-like hydrolase (HAD) superfamily protein             |
| 832285 | CAF1b     | Polynucleotidyl transferase, ribonuclease H-like superfamily protein       |
| 828516 | AT4G24160 | alpha/beta-Hydrolases superfamily protein                                  |
| 839536 | BPS1      | BPS1-like protein (DUF793)                                                 |
| 821005 | AT3G17410 | Protein kinase superfamily protein                                         |
| 827481 | CBL1      | calcineurin B-like protein 1                                               |
| 834356 | TOPP6     | type one serine/threonine protein phosphatase 6                            |

|        |           |                                                                                        |
|--------|-----------|----------------------------------------------------------------------------------------|
| 843120 | AT1G67920 | hypothetical protein                                                                   |
| 832225 | BPM5      | BTB-POZ and MATH domain 5                                                              |
| 819684 | ATL6      | RING/U-box superfamily protein                                                         |
| 814768 | AT2G02370 | SNARE associated Golgi protein family                                                  |
| 816629 | AT2G20950 | phospholipase-like protein (PEARL1 4) family protein                                   |
| 816384 | AT2G18690 | transmembrane protein                                                                  |
| 824188 | CEJ1      | cooperatively regulated by ethylene and jasmonate 1                                    |
| 843412 | AT1G70750 | myosin-binding protein (Protein of unknown function, DUF593)                           |
| 831037 | AT5G11650 | alpha/beta-Hydrolases superfamily protein                                              |
| 824405 | SYP122    | syntaxin of plants 122                                                                 |
| 816647 | AT2G21120 | magnesium transporter, putative (DUF803)                                               |
| 823846 | AT3G46930 | Protein kinase superfamily protein                                                     |
| 834429 | AT5G44060 | embryo sac development arrest protein                                                  |
| 819057 | AT2G44500 | O-fucosyltransferase family protein                                                    |
| 830148 | RABH1c    | RAB GTPase homolog H1C                                                                 |
| 842527 | WRKY6     | WRKY family transcription factor                                                       |
| 839519 | AT1G03370 | C2 calcium/lipid-binding and GRAM domain containing protein                            |
| 838438 | MYB51     | myb domain protein 51                                                                  |
| 838114 | AT1G15430 | hypothetical protein (DUF1644)                                                         |
| 843500 | CK1       | choline kinase 1                                                                       |
| 830333 | MTM2      | Myotubularin-like phosphatases II superfamily                                          |
| 825525 | TTA2      | fibronectin type III domain protein (DUF1423)                                          |
| 816909 | LYK4      | protein kinase family protein / peptidoglycan-binding LysM domain-containing protein   |
| 829753 | AT4G35985 | Senescence/dehydration-associated protein-like protein                                 |
| 819222 | AT2G46150 | Late embryogenesis abundant (LEA) hydroxyproline-rich glycoprotein family              |
| 824254 | AT3G50900 | hypothetical protein                                                                   |
| 822148 | AT3G25610 | ATPase E1-E2 type family protein / haloacid dehalogenase-like hydrolase family protein |
| 824900 | ACA11     | autoinhibited Ca <sup>2+</sup> -ATPase 11                                              |
| 824693 | MKP1      | mitogen-activated protein kinase phosphatase 1                                         |
| 820018 | TH9       | thioredoxin H-type 9                                                                   |
| 819314 | ABCB4     | ATP binding cassette subfamily B4                                                      |
| 839669 | SAT32     | interferon-related developmental regulator family protein / IFRD protein family        |
| 817553 | AT2G30020 | Protein phosphatase 2C family protein                                                  |
| 842430 | AT1G61360 | S-locus lectin protein kinase family protein                                           |
| 828228 | AT4G01870 | tolB protein-like protein                                                              |
| 830840 | AT5G09800 | ARM repeat superfamily protein                                                         |
| 830295 | AT5G04170 | Calcium-binding EF-hand family protein                                                 |
| 827630 | AT4G18950 | Integrin-linked protein kinase family                                                  |
| 818143 | AT2G35730 | Heavy metal transport/detoxification superfamily protein                               |
| 839545 | AT1G01260 | basic helix-loop-helix (bHLH) DNA-binding superfamily protein                          |
| 821586 | CPK9      | calmodulin-domain protein kinase 9                                                     |



|        |              |                                                                   |
|--------|--------------|-------------------------------------------------------------------|
| 822280 | SNM1         | DNA repair metallo-beta-lactamase family protein                  |
| 817783 | AT2G32235    | hypothetical protein                                              |
| 819320 | PTI1-4       | Protein kinase superfamily protein                                |
| 831058 | AT5G11850    | Protein kinase superfamily protein                                |
| 826409 | MEKK1        | MAPK/ERK kinase kinase 1                                          |
| 839998 | AT1G31130    | polyadenylate-binding protein 1-B-binding protein                 |
| 828271 | MSRB7        | methionine sulfoxide reductase B7                                 |
| 827984 | ECA2         | ER-type Ca <sup>2+</sup> -ATPase 2                                |
| 829333 | AT4G32020    | serine/arginine repetitive matrix-like protein                    |
| 831365 | WRKY72       | WRKY DNA-binding protein 72                                       |
| 833550 | AT5G35735    | Auxin-responsive family protein                                   |
| 838295 | RLP2         | receptor like protein 2                                           |
| 832662 | AT5G25930    | kinase family with leucine-rich repeat domain-containing protein  |
| 837198 | Plsp2A       | Peptidase S24/S26A/S26B/S26C family protein                       |
| 817312 | AT2G27660    | Cysteine/Histidine-rich C1 domain family protein                  |
| 835735 | AT5G56350    | Pyruvate kinase family protein                                    |
| 839508 | GAOX6        | gibberellin 2-oxidase 6                                           |
| 828426 | CRK19        | cysteine-rich RLK (RECEPTOR-like protein kinase) 19               |
| 824577 | AT3G54100    | O-fucosyltransferase family protein                               |
| 820378 | AT3G12040    | DNA-3-methyladenine glycosylase (MAG)                             |
| 821460 | LOH2         | LAG1 homologue 2                                                  |
| 820023 | ATSIK        | Protein kinase superfamily protein                                |
| 843939 | AT1G76070    | hypothetical protein                                              |
|        | None         | None                                                              |
| 839670 | ACA1         | autoinhibited Ca <sup>2+</sup> -ATPase 1                          |
| 830396 | AT5G05140    | Transcription elongation factor (TFIIS) family protein            |
| 819401 | AT2G47890    | B-box type zinc finger protein with CCT domain-containing protein |
| 835828 | CYP81F2      | cytochrome P450, family 81, subfamily F, polypeptide 2            |
| 818549 | BIK1         | botrytis-induced kinase1                                          |
| 837223 | STN1         | Nucleic acid-binding, OB-fold-like protein                        |
| 837276 | PLL5         | pol-like 5                                                        |
| 831784 | AT5G02230    | Haloacid dehalogenase-like hydrolase (HAD) superfamily protein    |
| 818605 | CZF1         | zinc finger (CCCH-type) family protein                            |
| 816819 | AT2G22880    | VQ motif-containing protein                                       |
| 843639 | PEPR1        | PEP1 receptor 1                                                   |
| 821202 | AT3G02070    | Cysteine proteinases superfamily protein                          |
| 841229 | ECT7         | evolutionarily conserved C-terminal region 7                      |
| 819260 | PI4K GAMMA 4 | phosphoinositide 4-kinase gamma 4                                 |
| 827826 | CML42        | calmodulin like 42                                                |
| 842450 | MLO6         | Seven transmembrane MLO family protein                            |
| 829100 | AT4G29780    | nuclease                                                          |

|        |           |                                                                |
|--------|-----------|----------------------------------------------------------------|
| 837965 | AT1G14040 | EXS (ERD1/XPR1/SYG1) family protein                            |
| 825844 | NDB2      | NAD(P)H dehydrogenase B2                                       |
| 821717 | CERK1     | chitin elicitor receptor kinase 1                              |
| 817758 | AT2G31990 | Exostosin family protein                                       |
| 843106 | AT1G67800 | Copine (Calcium-dependent phospholipid-binding protein) family |
| 836799 | AT5G66670 | pectinesterase, putative (DUF677)                              |
| 828400 | UTR2      | UDP-galactose transporter 2                                    |
| 825139 | HLECRK    | lectin-receptor kinase                                         |
| 836094 | EXO70H7   | exocyst subunit exo70 family protein H7                        |
| 837947 | AT1G13880 | ELM2 domain-containing protein                                 |
| 839846 | CAD1      | MAC/Perforin domain-containing protein                         |
| 835329 | AT5G52530 | dentin sialophosphoprotein-like protein                        |
| 838835 | PAPP2C    | phytochrome-associated protein phosphatase type 2C             |
| 824920 | CPK32     | calcium-dependent protein kinase 32                            |
| 843988 | AT1G76550 | Phosphofructokinase family protein                             |
| 824004 | AT3G48450 | RPM1-interacting protein 4 (RIN4) family protein               |
| 821796 | AT3G22260 | Cysteine proteinases superfamily protein                       |
| 830683 | AT5G01950 | Leucine-rich repeat protein kinase family protein              |
| 816993 | WRKY17    | WRKY DNA-binding protein 17                                    |
| 843325 | AT1G69890 | actin cross-linking protein (DUF569)                           |
| 832332 | AT5G22690 | Disease resistance protein (TIR-NBS-LRR class) family          |
| 816031 | FUT4      | fucosyltransferase 4                                           |
| 834430 | CAD1      | phytochelatin synthase 1 (PCS1)                                |
| 841328 | AT1G49050 | Eukaryotic aspartyl protease family protein                    |
| 837210 | EXO70B2   | exocyst subunit exo70 family protein B2                        |
| 816864 | WRKY15    | WRKY DNA-binding protein 15                                    |
| 827435 | SCL13     | SCARECROW-like 13                                              |
| 835577 | AT5G54860 | Major facilitator superfamily protein                          |
| 833803 | AT5G38210 | Protein kinase family protein                                  |
| 834721 | AT5G46780 | VQ motif-containing protein                                    |
| 818533 | ABCB6     | P-glycoprotein 6                                               |
| 824608 | EP3       | homolog of carrot EP3-3 chitinase                              |
|        | None      | None                                                           |
| 818376 | AT2G37980 | O-fucosyltransferase family protein                            |
| 844001 | OPR1      | 12-oxophytodienoate reductase 1                                |
| 837791 | KEU       | Sec1/munc18-like (SM) proteins superfamily                     |
| 834824 | AT5G47730 | Sec14p-like phosphatidylinositol transfer family protein       |
| 824761 | CCR3      | CRINKLY4 related 3                                             |
| 826730 | ACS6      | 1-aminocyclopropane-1-carboxylic acid (acc) synthase 6         |
| 820456 | ALIS1     | ALA-interacting subunit 1                                      |
| 838743 | SCL1      | SCARECROW-like 1                                               |

|        |           |                                                                                             |
|--------|-----------|---------------------------------------------------------------------------------------------|
| 837540 | AT1G10050 | glycosyl hydrolase family 10 protein / carbohydrate-binding domain-containing protein       |
| 839735 | NSL1      | MAC/Perforin domain-containing protein                                                      |
| 824713 | AT3G55470 | Calcium-dependent lipid-binding (CaLB domain) family protein                                |
| 842064 | AT1G56120 | Leucine-rich repeat transmembrane protein kinase                                            |
| 839028 | FH4       | formin homologue 4                                                                          |
| 820141 | AT3G09830 | Protein kinase superfamily protein                                                          |
| 821990 | GATA1     | GATA transcription factor 1                                                                 |
| 838928 | AT1G23200 | Plant invertase/pectin methylesterase inhibitor superfamily                                 |
| 824627 | BZIP25    | basic leucine zipper 25                                                                     |
| 837352 | AT1G08315 | ARM repeat superfamily protein                                                              |
| 834736 | AT5G46910 | Transcription factor jumonji (jmi) family protein / zinc finger (C5HC2 type) family protein |
| 838236 | AT1G16670 | Protein kinase superfamily protein                                                          |
| 818429 | WRKY33    | WRKY DNA-binding protein 33                                                                 |
| 843411 | AT1G70740 | Protein kinase superfamily protein                                                          |
| 821780 | AT3G22160 | VQ motif-containing protein                                                                 |
| 822169 | AOC3      | allene oxide cyclase 3                                                                      |
| 820019 | S6K2      | serine/threonine protein kinase 2                                                           |
| 834069 | AT5G40690 | histone-lysine N-methyltransferase trithorax-like protein                                   |
| 834867 | PAT1      | GRAS family transcription factor                                                            |
| 824077 | AT3G49160 | pyruvate kinase family protein                                                              |
| 829536 | AT4G33920 | Protein phosphatase 2C family protein                                                       |
| 839748 | GRX480    | Thioredoxin superfamily protein                                                             |
| 830621 | BON2      | Calcium-dependent phospholipid-binding Copine family protein                                |
| 838184 | WAKL4     | wall associated kinase-like 4                                                               |
| 822594 | UGD2      | UDP-glucose 6-dehydrogenase family protein                                                  |
| 824711 | PBL1      | PBS1-like 1                                                                                 |
| 835538 | FQR1      | flavodoxin-like quinone reductase 1                                                         |
| 824707 | AT3G55410 | 2-oxoglutarate dehydrogenase, E1 component                                                  |
| 829346 | AT4G32140 | EamA-like transporter family                                                                |
| 816877 | AT2G23450 | Protein kinase superfamily protein                                                          |
| 824762 | AT3G55960 | Haloacid dehalogenase-like hydrolase (HAD) superfamily protein                              |
| 840339 | STOP1     | C2H2 and C2HC zinc fingers superfamily protein                                              |
| 831876 | AT5G03320 | Protein kinase superfamily protein                                                          |
| 839942 | MUR4      | NAD(P)-binding Rossmann-fold superfamily protein                                            |
| 820543 | AT3G13430 | RING/U-box superfamily protein                                                              |
| 818171 | YLS9      | Late embryogenesis abundant (LEA) hydroxyproline-rich glycoprotein family                   |
| 827622 | HSF A4A   | heat shock transcription factor A4A                                                         |
| 842431 | AT1G61370 | S-locus lectin protein kinase family protein                                                |
| 831688 | AT5G01720 | RNI-like superfamily protein                                                                |
| 832514 | AT5G24430 | Calcium-dependent protein kinase (CDPK) family protein                                      |
| 835600 | MAPKKK15  | mitogen-activated protein kinase kinase kinase 15                                           |

|         |           |                                                                          |
|---------|-----------|--------------------------------------------------------------------------|
| 831543  | AT5G16800 | Acyl-CoA N-acyltransferases (NAT) superfamily protein                    |
| 829282  | WRKY11    | WRKY DNA-binding protein 11                                              |
| 836860  | SKIP2     | SKP1/ASK1-interacting protein 2                                          |
| 2745879 | SAG20     | senescence associated gene 20                                            |
| 842676  | AT1G63720 | hydroxyproline-rich glycoprotein family protein                          |
| 835575  | AT5G54850 | hexon                                                                    |
| 838182  | WAKL2     | wall associated kinase-like 2                                            |
| 843914  | AT1G75810 | transmembrane protein                                                    |
| 831322  | AT5G14700 | NAD(P)-binding Rossmann-fold superfamily protein                         |
| 840158  | MYC2      | Basic helix-loop-helix (bHLH) DNA-binding family protein                 |
| 820355  | SYP121    | syntaxin of plants 121                                                   |
| 839523  | MPK11     | MAP kinase 11                                                            |
| 829894  | CYP81F3   | cytochrome P450, family 81, subfamily F, polypeptide 3                   |
| 844421  | CCR2      | cinnamoyl coa reductase                                                  |
| 817159  | AT2G26190 | calmodulin-binding family protein                                        |
| 821071  | AT3G01820 | P-loop containing nucleoside triphosphate hydrolases superfamily protein |
| 832415  | AT5G23490 | hypothetical protein                                                     |
| 831444  | AT5G15870 | glycosyl hydrolase family 81 protein                                     |
| 843174  | PDE337    | VQ motif-containing protein                                              |
| 816630  | pEARLI4   | phospholipase-like protein (PEARLI 4) family protein                     |
| 843584  | LOX4      | PLAT/LH2 domain-containing lipoxygenase family protein                   |
| 829559  | UGT73B3   | UDP-glucosyl transferase 73B3                                            |
| 832660  | RLP52     | receptor like protein 52                                                 |
| 836381  | MOS14     | ARM repeat superfamily protein                                           |
| 831159  | AT5G13200 | GRAM domain family protein                                               |
| 828355  | TPPG      | Haloacid dehalogenase-like hydrolase (HAD) superfamily protein           |
| 837881  | ACA.I     | autoinhibited Ca <sup>2+</sup> /ATPase II                                |
| 818422  | AT2G38410 | ENTH/VHS/GAT family protein                                              |
| 837061  | AT1G05575 | transmembrane protein                                                    |
| 828950  | AT4G28350 | Concanavalin A-like lectin protein kinase family protein                 |
| 842249  | ZCF37     | ZCF37                                                                    |
| 816041  | UGT73B4   | UDP-glycosyltransferase 73B4                                             |
| 817774  | AT2G32150 | Haloacid dehalogenase-like hydrolase (HAD) superfamily protein           |
| 827165  | GPAT3     | glycerol-3-phosphate acyltransferase 3                                   |
| 830618  | XBAT33    | hypothetical protein                                                     |
| 831325  | AT5G14730 | hypothetical protein                                                     |
| 831967  | AT5G18490 | vacuolar sorting-associated protein (DUF946)                             |
| 830334  | AT5G04550 | type-1 restriction enzyme mjapx r protein (DUF668)                       |
| 816520  | AT2G20010 | Gls protein (DUF810)                                                     |
| 843560  | ERO1      | endoplasmic reticulum oxidoreductins 1                                   |
| 834112  | AT5G41100 | hydroxyproline-rich glycoprotein family protein                          |



|         |           |                                                                                             |
|---------|-----------|---------------------------------------------------------------------------------------------|
| 824671  | AT3G55050 | Protein phosphatase 2C family protein                                                       |
| 820264  | AT3G10930 | hypothetical protein                                                                        |
| 836869  | AT5G67340 | ARM repeat superfamily protein                                                              |
| 844423  | WRKY40    | WRKY DNA-binding protein 40                                                                 |
| 826735  | MPK5      | MAP kinase 5                                                                                |
| 842407  | EDA16     | SNF2 domain-containing protein / helicase domain-containing protein                         |
| 824808  | AT3G56410 | hypothetical protein (DUF3133)                                                              |
| 829158  | AT4G30350 | Double Clp-N motif-containing P-loop nucleoside triphosphate hydrolases superfamily protein |
| 829918  | ACA2      | calcium ATPase 2                                                                            |
| 823815  | RDUF1     | zinc finger (C3HC4-type RING finger) family protein                                         |
| 822580  | SDR4      | NAD(P)-binding Rossmann-fold superfamily protein                                            |
| 821309  | HIR2      | SPFH/Band 7/PHB domain-containing membrane-associated protein family                        |
| 834157  | AT5G41550 | Disease resistance protein (TIR-NBS-LRR class) family                                       |
| 830154  | CYP79B2   | cytochrome P450, family 79, subfamily B, polypeptide 2                                      |
| 814749  | TOM3      | tobamovirus multiplication protein 3                                                        |
| 828798  | AT4G26910 | Dihydrolipoamide succinyltransferase                                                        |
| 821806  | AOX1A     | alternative oxidase 1A                                                                      |
| 830720  | AT5G08240 | transmembrane protein                                                                       |
| 817855  | ZFN2      | zinc finger nuclease 2                                                                      |
| 828696  | AT4G25900 | Galactose mutarotase-like superfamily protein                                               |
| 844163  | AT1G78280 | transferases, transferring glycosyl groups                                                  |
| 816996  | AT2G24600 | Ankyrin repeat family protein                                                               |
| 5007832 | AT1G62422 | hypothetical protein                                                                        |
| 829589  | XLG2      | extra-large GTP-binding protein 2                                                           |
| 826541  | CPK4      | calcium-dependent protein kinase 4                                                          |
| 822119  | AGC2-1    | AGC (cAMP-dependent, cGMP-dependent and protein kinase C) kinase family protein             |
| 838289  | GSTU25    | glutathione S-transferase TAU 25                                                            |
| 817084  | AT2G25460 | EEIG1/EHBP1 protein amino-terminal domain protein                                           |
| 821400  | MKS1      | MAP kinase substrate 1                                                                      |
| 837321  | AT1G08050 | Zinc finger (C3HC4-type RING finger) family protein                                         |
| 843799  | GSTU10    | glutathione S-transferase TAU 10                                                            |
| 819413  | RKF3      | receptor-like kinase in in flowers 3                                                        |
| 836103  | RHL41     | C2H2-type zinc finger family protein                                                        |
| 841222  | AT1G48040 | Protein phosphatase 2C family protein                                                       |
| 839303  | TPK1      | thiamin pyrophosphokinase1                                                                  |
| 843246  | AT1G69150 | Cysteine/Histidine-rich C1 domain family protein                                            |
| 821877  | IAA2      | indole-3-acetic acid inducible 2                                                            |
| 834120  | AT5G41180 | leucine-rich repeat transmembrane protein kinase family protein                             |
| 820249  | BZIP28    | Basic-leucine zipper (bZIP) transcription factor family protein                             |
| 824331  | SDR2      | NAD(P)-binding Rossmann-fold superfamily protein                                            |
| 835722  | PRA1.G2   | prenylated RAB acceptor 1.G2                                                                |



|        |           |                                                                          |
|--------|-----------|--------------------------------------------------------------------------|
| 836242 | SNAP33    | soluble N-ethylmaleimide-sensitive factor adaptor protein 33             |
| 828484 | LACS4     | AMP-dependent synthetase and ligase family protein                       |
| 836074 | RDUF2     | zinc finger (C3HC4-type RING finger) family protein                      |
| 822462 | GATL10    | galacturonosyltransferase-like 10                                        |
| 839561 | MC1       | metacaspase 1                                                            |
| 841992 | AT1G55450 | S-adenosyl-L-methionine-dependent methyltransferases superfamily protein |
| 817115 | AT2G25735 | hypothetical protein                                                     |
| 823908 | AT3G47540 | Chitinase family protein                                                 |
| 820622 | CAX9      | cation exchanger 9                                                       |
| 830078 | AT4G39230 | NmrA-like negative transcriptional regulator family protein              |
| 834695 | AT5G46520 | Disease resistance protein (TIR-NBS-LRR class) family                    |
| 816382 | AT2G18670 | RING/U-box superfamily protein                                           |
| 842203 | ZF14      | MATE efflux family protein                                               |
| 839666 | STZ       | salt tolerance zinc finger                                               |
| 817194 | AR781     | AR781, pheromone receptor-like protein (DUF1645)                         |
| 831039 | NADP-ME2  | NADP-malic enzyme 2                                                      |
| 817753 | AT2G31945 | transmembrane protein                                                    |
| 842164 | PUP17     | purine permease 17                                                       |
| 835568 | AT5G54780 | Ypt/Rab-GAP domain of gyp1p superfamily protein                          |
| 834210 | AT5G42050 | DCD (Development and Cell Death) domain protein                          |
| 823551 | CAF1a     | Polynucleotidyl transferase, ribonuclease H-like superfamily protein     |
| 835008 | CP1       | Ca <sup>2+</sup> -binding protein 1                                      |
| 842686 | AT1G63830 | PLAC8 family protein                                                     |
| 830470 | PIRL1     | plant intracellular ras group-related LRR 1                              |
| 814817 | SUT2      | sucrose transporter 2                                                    |
| 841778 | AT1G53430 | Leucine-rich repeat transmembrane protein kinase                         |
| 830058 | EDS5      | MATE efflux family protein                                               |
| 838470 | CDPK1     | calcium-dependent protein kinase 1                                       |
| 832530 | TIP       | TCV-interacting protein                                                  |
| 842951 | ETR1      | Signal transduction histidine kinase, hybrid-type, ethylene sensor       |
| 820357 | PUB24     | E3 ubiquitin-protein ligase PUB24-like protein                           |
| 836739 | AT5G66070 | RING/U-box superfamily protein                                           |
| 835012 | WRKY48    | WRKY DNA-binding protein 48                                              |
| 820491 | NiaP      | Major facilitator superfamily protein                                    |
| 827062 | RHF1A     | RING-H2 group F1A                                                        |
| 830012 | AT4G38550 | phospholipase-like protein (PEARL1 4) family protein                     |
| 843814 | AT1G74750 | Pentatricopeptide repeat (PPR) superfamily protein                       |
| 838207 | OCT6      | organic cation/carnitine transporter 6                                   |
| 832060 | SMG7      | Telomerase activating protein Est1                                       |
| 820155 | MDHAR     | monodehydroascorbate reductase                                           |
| 827891 | B120      | S-locus lectin protein kinase family protein                             |

|        |           |                                                        |
|--------|-----------|--------------------------------------------------------|
| 824764 | SZF1      | salt-inducible zinc finger 1                           |
| 825397 | AT3G62240 | RING/U-box superfamily protein                         |
| 829891 | CYP81D8   | cytochrome P450, family 81, subfamily D, polypeptide 8 |
| 819362 | NDT1      | NAD+ transporter 1                                     |
| 843474 | NAP5      | non-intrinsic ABC protein 5                            |
| 826631 | AT4G10390 | Protein kinase superfamily protein                     |
| 824257 | BCS1      | cytochrome BC1 synthase                                |

## Extended Data Table 2: Accession numbers of the sequences

|                                                       |                                                                                                                                                                                                                                                                                                                                                                                                                                                                                                                                                                                                                                                                                                                                                                                                                                                                                                                                                                                                                                                                                                                                                                                                                                                                                                                                                                                                                                                                                                                                                                                                                                                          |
|-------------------------------------------------------|----------------------------------------------------------------------------------------------------------------------------------------------------------------------------------------------------------------------------------------------------------------------------------------------------------------------------------------------------------------------------------------------------------------------------------------------------------------------------------------------------------------------------------------------------------------------------------------------------------------------------------------------------------------------------------------------------------------------------------------------------------------------------------------------------------------------------------------------------------------------------------------------------------------------------------------------------------------------------------------------------------------------------------------------------------------------------------------------------------------------------------------------------------------------------------------------------------------------------------------------------------------------------------------------------------------------------------------------------------------------------------------------------------------------------------------------------------------------------------------------------------------------------------------------------------------------------------------------------------------------------------------------------------|
| <b>Arachis duranensis SLC25A44 isoform 1:</b>         | LOC107483350; XP_015959458.1                                                                                                                                                                                                                                                                                                                                                                                                                                                                                                                                                                                                                                                                                                                                                                                                                                                                                                                                                                                                                                                                                                                                                                                                                                                                                                                                                                                                                                                                                                                                                                                                                             |
| <b>Arachis duranensis SLC25A44 isoform 2:</b>         | LOC107483350, XP_020995737.1                                                                                                                                                                                                                                                                                                                                                                                                                                                                                                                                                                                                                                                                                                                                                                                                                                                                                                                                                                                                                                                                                                                                                                                                                                                                                                                                                                                                                                                                                                                                                                                                                             |
| <b>Arachis ipaensis SLC25A44:</b>                     | LOC107637593; XP_016196479.1                                                                                                                                                                                                                                                                                                                                                                                                                                                                                                                                                                                                                                                                                                                                                                                                                                                                                                                                                                                                                                                                                                                                                                                                                                                                                                                                                                                                                                                                                                                                                                                                                             |
| <b>Arachis hypogaea SLC25A44:</b>                     | LOC112796283; XP_025694448.1                                                                                                                                                                                                                                                                                                                                                                                                                                                                                                                                                                                                                                                                                                                                                                                                                                                                                                                                                                                                                                                                                                                                                                                                                                                                                                                                                                                                                                                                                                                                                                                                                             |
| <b>Saccharomyces cerevisiae SLC25s:</b>               | ScYBL030c, ScYBR085w, ScYBR104w, ScYBR192w, ScYBR291c, ScYDL119c, ScYDL198c, ScYEL006w, ScYER053c, ScYFR045w, ScYGR096w, ScYGR257c, ScYHR002w, ScYIL006w, ScYIL134w, ScYJL133w, ScYJR095w, ScYJRO77c, ScYKL120w, ScYKR052c, ScYLR348c, ScYMR056c, ScYMR166c, ScYMR241w, ScYNL003c, ScYNL083w, ScYOR100c, ScYOR130c, ScYOR222w, ScYPL134c, ScYPR011c, ScYPR021c, ScYPR058w, ScYPR128c, ScYDR470C                                                                                                                                                                                                                                                                                                                                                                                                                                                                                                                                                                                                                                                                                                                                                                                                                                                                                                                                                                                                                                                                                                                                                                                                                                                          |
| <b>Arabidopsis thaliana SLC25s:</b>                   | At1g14560, At1g14140, At1g74240, At1g25380, At1g79900, At1g72820, At1g07020, At1g78180, At1g0703, At2g33820, At2g35800, At2g22500, At2g46320, At2g47490, At2g37890, At2g17270, At3g55640, At3g54110, At3g51870, At3g20240, At3g05290, At3g53940, At3g48850, At4g11440, At4g26180, At4g24570, At4g32400, At4g01100, At4g39460, At4g27940, At4g28390, At5g17400, At5g26200, At5g01500, At5g15640 (SLC25A44), At5g56450, At5g13490, At5g48970, At5g09470, At5g46800, At5g19760, At5g58970, At5g07320, At5g61810, At5g01340, At5g42130, At5g14040, At5g51050, At5g66380, At5g27520, At5g64970, At1g07025, At1g34065, At2g26360, At2g30160, At2g39970, At3g08580, At3g21390, At4g03115, At4g15010 (NP_568317.1, NP_563775.1, NP_563776.1, NP_172866.1, NP_001321154.1, NP_564233.1, NP_564436.4, NP_565048.1, NP_177564.2, NP_565171.4, NP_179319.1, NP_178108.1, NP_179836.1, NP_180204.2, NP_180577.1, NP_001324478.1, NP_001324476.1, NP_181325.2, NP_850252.1, NP_181526.1, NP_001325192.1, NP_850452.1, NP_566102.1, NP_566251.1, NP_850541.1, NP_188659.1, NP_566683.1, NP_190454.1, NP_190755.2, NP_190962.2, NP_190979.1, NP_001319759.1, NP_191123.1, NP_001190650.1, NP_680566.5, NP_001329299.1, NP_001319903.1, NP_567453.1, NP_194188.1, NP_001320068.1, NP_001329416.1, NP_567790.1, NP_194568.1, NP_194966.1, NP_001190968.1, NP_195754.1, NP_568060.1, NP_195770.1, NP_196349.1, NP_196509.1, NP_196853.1, NP_196908.1, NP_197477.1, NP_568345.1, NP_197992.1, NP_198104.1, NP_199028.1, NP_568670.1, NP_001332470.1, NP_199708.1, NP_199918.2, NP_568894.1, NP_201302.1, NP_569032.1, NP_568940.1, NP_199918.2, NP_568317.1, NP_001330083.1) |
| <b>Toxoplasma gondii ME49 SLC25s:</b>                 | TgXP_002366558.1, TgXP_002370456.1, TgXP_018635179.1, TgXP_002365941.1, TgXP_002366007.1, TgXP_002366943.1, TgXP_002367179.1, TgXP_002367239.2, TgXP_002367322.1, TgXP_002369636.2, TgXP_002369649.1, TgXP_002370137.2, TgXP_002370602.1, TgXP_002370651.1, TgXP_002371759.1, TgXP_018635049.1, TgXP_018635362.1, TgXP_018635818.1, TgXP_018636111.1, TgXP_018637381.1, TgXP_018637483.1                                                                                                                                                                                                                                                                                                                                                                                                                                                                                                                                                                                                                                                                                                                                                                                                                                                                                                                                                                                                                                                                                                                                                                                                                                                                 |
| <b>Trypanosoma brucei TREU927/4 GUTat10.1 SLC25s:</b> | Tba1.116.m00278 Tb08.29H22.850 Tb927.8.4440, Tba1.117.m00198 Tb08.29O4.550 Tb927.8.1310, Tba1.175.m00296 Tb07.5F10.810 Tb927.7.3940, Tba1.196.m00393 Tb08.11J15.1150 Tb927.8.5810, Tba1.210.m00039 Tb05.30H13.730 Tb927.5.1550, Tba1.26.m00116 10C8.285 Tb927.2.2970, Tba1.311.m00187 10C8.285 Tb927.2.2970, Tba1.312.m00303 Tb03.27C5.440 Tb927.3.2980, Tba1.313.m00170 Tb04.2L9.1150 Tb927.4.1660, Tba1.314.m00167 Tb05.30H13.730 Tb927.5.1550, Tba1.316.m00386 Tb07.5F10.810 Tb927.7.3940, Tba1.330.m00122 Tb08.29O4.550 Tb927.8.1310, Tba1.330.m00325 Tb08.28L1.350 Tb927.8.3330, Tba1.330.m00437 Tb08.29H22.850 Tb927.8.4440, Tba1.330.m00574 Tb08.11J15.1150 Tb927.8.5810, Tba1.339.m00858 Tb09.211.1750, Tba1.339.m00917 Tb09.211.2370, Tba1.339.m01002 Tb09.211.3200, Tba1.340.m00470 Tb10.70.2290, Tba1.340.m00997 Tb10.406.0470, Tba1.340.m01218 Tb10.389.0690, Tba1.340.m01356 Tb10.61.2510, Tba1.340.m01408 Tb10.61.1830, Tba1.340.m01409 Tb10.61.1820, Tba1.340.m01410 Tb10.61.1810, Tba1.340.m01490 Tb10.61.0610, Tba1.341.m00018 Tb11.03.0870, Tba1.341.m00506 Tb11.02.2960, Tba1.341.m01308 Tb11.01.5040, Tba1.341.m01399 Tb11.01.5950, Tba1.341.m01400 Tb11.01.5960, Tba1.341.m01400 Tb11.01.5960, Tba1.79.m00365 Tb04.2L9.1150 Tb927.4.1660, Tba1.82.m00204 Tb08.28L1.350 Tb927.8.3330, Tba1.340.m01245(SLC25A44; XP_827797.1) Tb10.389.0340                                                                                                                                                                                                                                                                                           |
| <b>Homo sapiens SLC25s:</b>                           | SLC25A44 isoform 1 E9PGQ0 ; NP_001273113.1, SLC25A44 isoform 2 Q96H78 ; NP_055470.1, SLC25-10 A0A0S22382 , SLC25-10 A0A0S223G3 , SLC25-10 A0A0S223I3 , SLC25-10 F6RGN5 , SLC25-10 Q9UBX3 , SLC25-11 I3L1P8 , SLC25-11 Q02978 , SLC25-11 Q6IBH0 , SLC25-12 B4DGK6 , SLC25-12 O75746 , SLC25-13 Q75KX8 , SLC25-13 Q9UJS0 , SLC25-14 F6SL11 , SLC25-                                                                                                                                                                                                                                                                                                                                                                                                                                                                                                                                                                                                                                                                                                                                                                                                                                                                                                                                                                                                                                                                                                                                                                                                                                                                                                        |

|                                                                                                                                                                                                                                                                                                                                                                                                                                                                                                                                                                                                                                                                                                                                                                                                                                                                                                                                                                                                                                                                                                                                                                                                                                                                                                                                                                                                                                                                                                                                                                                                                                                                                                                                                                                                                                                                                                                                              |
|----------------------------------------------------------------------------------------------------------------------------------------------------------------------------------------------------------------------------------------------------------------------------------------------------------------------------------------------------------------------------------------------------------------------------------------------------------------------------------------------------------------------------------------------------------------------------------------------------------------------------------------------------------------------------------------------------------------------------------------------------------------------------------------------------------------------------------------------------------------------------------------------------------------------------------------------------------------------------------------------------------------------------------------------------------------------------------------------------------------------------------------------------------------------------------------------------------------------------------------------------------------------------------------------------------------------------------------------------------------------------------------------------------------------------------------------------------------------------------------------------------------------------------------------------------------------------------------------------------------------------------------------------------------------------------------------------------------------------------------------------------------------------------------------------------------------------------------------------------------------------------------------------------------------------------------------|
| 14 O95258 , SLC25-15 B2R921 , SLC25-15 Q9Y619 , SLC25-16 B7Z8R5 , SLC25-16 P16260 , SLC25-17 B0QYW5 , SLC25-17 F6RTR7 , SLC25-17 F8WE74 , SLC25-17 O43808 , SLC25-18 AOA024ROWO , SLC25-18 Q9H1K4 , SLC25-19 Q5IS35 , SLC25-19 Q5IPC1 , SLC25-19 Q9HC21 , SLC25-1 B4DP62 , SLC25-1 D9HTE9 , SLC25-1 P53007 , SLC25-20 C9JPE1 , SLC25-20 O43772 , SLC25-21 Q9BQT8 , SLC25-22 AOA024RCA6 , SLC25-22 AOA0D9SFE1 , SLC25-22 E9PJH7 , SLC25-22 Q9H936 , SLC25-23 B4DSH6 , SLC25-23 MOQZJ5 , SLC25-23 MOQZT4 , SLC25-23 MOR1W8 , SLC25-23 Q9BV35 , SLC25-24 B4DI95 , SLC25-24 Q6NUK1 , SLC25-25 H7C4Z4 , SLC25-25 Q6KCM7 , SLC25-26 H7C430 , SLC25-26 Q70HW3 , SLC25-27 B4DHR4 , SLC25-27 O95847 , SLC25-28 Q96A46 , SLC25-28 X6RFA8 , SLC25-29 G3V477 , SLC25-29 Q8N8R3 , SLC25-2 Q9BXI2 , SLC25-30 B3KSR0 , SLC25-30 B3KTE8 , SLC25-30 Q5SV54 , SLC25-31 Q9H0C2 , SLC25-32 AOA024R9D0 , SLC25-32 Q9H2D1 , SLC25-33 Q9BSK2 , SLC25-34 Q6PIV7 , SLC25-35 Q3KQZ1 , SLC25-36 B4DL01 , SLC25-36 J3KQA4 , SLC25-36 Q96CQ1 , SLC25-37 Q9NY22 , SLC25-38 AOA024R2L5 , SLC25-38 AOA2R8Y553 , SLC25-38 AOA2R8Y823 , SLC25-38 , AOA2R8YE85 , SLC25-38 Q96DW6 , SLC25-39 B4DFG5 , SLC25-39 K7EMR4 , SLC25-39 K7EMW3 , SLC25-39 Q9BZJ4 , SLC25-3 AOA024RBE8 , SLC25-3 AOA024RBH9 , SLC25-3 B2RE88 , SLC25-3 F8VVM2 , SLC25-3 Q00325 , SLC25-40 Q8TBP6 , SLC25-41 Q8N5S1 , SLC25-42 Q86VD7 , SLC25-43 Q8WUT9 , SLC25-45 E9PJQ3 , SLC25-45 Q8N413 , SLC25-46 B7Z6C8 , SLC25-46 E7EVY2 , SLC25-46 Q96AG3 , SLC25-47 G3V374 , SLC25-47 Q6Q0C1 , SLC25-48 J3KQI1 , SLC25-48 Q6ZT89 , SLC25-4 AOA0S2Z3H3 , SLC25-4 P12235 , SLC25-4 V9GYG0 , SLC25-52 I3L0B8 , SLC25-52 Q3SY17 , SLC25-53 Q5H9E4 , SLC25-5 P05141 , SLC25-5 Q6NVC0 , SLC25-5 Q9H1U9 , SLC25-6 P12236 , SLC25-6 Q6I9V5 , SLC25-7 P25874 , SLC25-8 P55851 , SLC25-9 P55916 , SLC25-50 NP_055157.1 , SLC25-50 NP_001304162.1 , SLC25-50 NP_001304161.1 , SLC25-49 NP_00125857.1 , SLC25-51 NP_219480.1 |
| <b>Schizosaccharomyces pombe SLC25s:</b> SpSPAC4G8.08(Q09834), SpSPAC4G9.20c(Q1024899), SpSPAC12B10.09(Q10442), SpSPAC17H9.08(O13805), SpSPBC29A3.11c(O59674), SpSPCC1442.03(Q76PC3), SpSPBC1604.04(O94370), SpSPAC8C9.12c(O14281), SpSPCC1682.09c(O74439), SpSPBC12D12.05c(O94502), SpSPBC1703.13c(Q9P7V8), SpSPAC19G12.05(O13844), SpANC1(Q09188), SpSPBP23A10.06(Q9P7X9), SpSPBC83.13(P78763), SpPi069(O13660), SpSPBC1271.11(O94344), SpSPAC227.03c(Q9UTD6), SpOAC1(Q9UTN1), SpSPAC328.09(Q9P377), SpSPAC688.09(Q9P6L7), SpSPAC823.10c(Q9P6N6)                                                                                                                                                                                                                                                                                                                                                                                                                                                                                                                                                                                                                                                                                                                                                                                                                                                                                                                                                                                                                                                                                                                                                                                                                                                                                                                                                                                           |
| <b>Penicillium brasilianum SLC25s:</b> CEJ53785, CEJ54003, CEJ54406, CEJ54698, CEJ54728, CEJ54729, CEJ56447, CEJ56561, CEJ56594, CEJ56802, CEJ57296, CEJ57592, CEJ57626, CEJ58128, CEJ58181, CEJ58192, CEJ58313, CEJ58565, CEJ58632, CEJ58953, CEJ59015, CEJ60733, CEJ60822, CEJ60848, CEJ61183, CEJ61303, CEJ61709, CEJ62024, CEJ62087, CEJ62095, CEJ62174, CEO58508, CEO59069, CEO59692, CEO59841, CEO59910, CEO60187, CEO60305, CEO60440, CEO60441, CEO60498, CEO60658, CEJ58312, CEJ60343, CEJ62127                                                                                                                                                                                                                                                                                                                                                                                                                                                                                                                                                                                                                                                                                                                                                                                                                                                                                                                                                                                                                                                                                                                                                                                                                                                                                                                                                                                                                                      |
| <b>Micromonas commoda SLC25s:</b> XP_002499375.1, XP_002500000.1, XP_002500028.1, XP_002500224.1, XP_002500313.1, XP_002500487.1, XP_002501164.1, XP_002501167.1, XP_002501272.1, XP_002501280.1, XP_002501327.1, XP_002501559.1, XP_002502042.1, XP_002502429.1, XP_002502432.1, XP_002502611.1, XP_002502691.1, XP_002502963.1, XP_002502989.1, XP_002503138.1, XP_002503139.1, XP_002503204.1, XP_002503554.1, XP_002503601.1, XP_002503685.1, XP_002503900.1, XP_002504104.1, XP_002504685.1, XP_002505072.1, XP_002505284.1, XP_002505418.1, XP_002505989.1 (SLC25A44), XP_002505990.1 (SLC25A44), XP_002506016.1, XP_002506340.1, XP_002506755.1, XP_002507364.1, XP_002507469.1, XP_002508333.1, XP_002508974.1, XP_002509046.1, XP_002509174.1, XP_002509195.1, XP_002509228.1, XP_002509286.1                                                                                                                                                                                                                                                                                                                                                                                                                                                                                                                                                                                                                                                                                                                                                                                                                                                                                                                                                                                                                                                                                                                                       |
| <b>Dictyostelium fasciculatum SLC25s:</b> DfXP_004350022.1, DfXP_004350212.1, DfXP_004350854.1, DfXP_004350609.1, DfXP_004351882.1, DfXP_004352164.1, DfXP_004353860.1, DfXP_004354820.1, XP_004355517.1, DfXP_004355985.1, DfXP_004356144.1, DfXP_004357211.1, DfXP_004357679.1, DfXP_004357861.1, DfXP_004358573.1, DfXP_004358716.1, DfXP_004358737.1, DfXP_004358844.1, DfXP_004358997.1, DfXP_004359404.1, DfXP_004359534.1, DfXP_004360107.1, DfXP_004360873.1, DfXP_004361047.1, DfXP_004361616.1, DfXP_004361870.1, DfXP_004362737.1, DfXP_004366438.1, DfXP_004366584.1, DfXP_004366990.1, DfXP_004367267.1, DfXP_004367315.1, DfXP_004362985.1                                                                                                                                                                                                                                                                                                                                                                                                                                                                                                                                                                                                                                                                                                                                                                                                                                                                                                                                                                                                                                                                                                                                                                                                                                                                                     |
| <b>Caenorhabditis elegans SLC25s:</b> Ce_B0432.4(MISC-1), Ce_C14C10.1, Ce_C16C10.1, Ce_C33F10.12, Ce_C42C1.10(HPO-12), Ce_C47E12.2, Ce_C54G10.4, Ce_D1046.3(Q18934), Ce_F01G4.6(P40614), Ce_F17E5.2(Q19529), Ce_F20D1.9(Q93540), Ce_F13G3.7-slc25A44a, Ce_F13G3.7-SLC25A44b, Ce_F25B4.7(P91270), Ce_F43G9.3(Q93717), Ce_F55A11.4(Q20799), Ce_F55G1.5(Q20847), Ce_K01C8.7(Q21084), Ce_K01H12.2(G5EFW8), Ce_K02F3.2(Q21153), Ce_K07B1.3(O01883), Ce_K11G12.5(G5EE96), Ce_K11H3.3(P34519), Ce_R07B7.10(Q21800), Ce_R07E3.4(Q21809), Ce_R11.1(O62347), Ce_T01B11.4(G5EFU2), Ce_T05F1.8(Q9XUR1), Ce_T09F3.2(G5EEG6), Ce_T10F2.2(Q10050), Ce_T20D3.5(O01256), Ce_T27E9.1(O45865), Ce_W02B12.9(Q23125), Ce_W02D3.6(O01813), Ce_Y43C5B.3(G5EDJ9)                                                                                                                                                                                                                                                                                                                                                                                                                                                                                                                                                                                                                                                                                                                                                                                                                                                                                                                                                                                                                                                                                                                                                                                                     |
| <b>Yarrowia lipolytica CLIB122 SLC25s:</b> Y.lipolyticaCAG77842.1 YALIOF05500p, Y.lipolyticaCAG78212.1 YALIOF14223p, Y.lipolyticaCAG78266.1 YALIOF15433p, Y.lipolyticaCAG78270.1 YALIOF15609p, Y.lipolyticaCAG78406.1 YALIOF18854p, Y.lipolyticaCAG78442.1 YALIOF19712p, Y.lipolyticaCAG78464.1 YALIOF20262p, Y.lipolyticaCAG78496.1 YALIOF20966p, Y.lipolyticaCAG78714.1 YALIOF26323p, Y.lipolyticaCAG79061.1 YALIOE03058p, Y.lipolyticaCAG79104.1 YALIOE04048p, Y.lipolyticaCAG79229.1 YALIOE06897p, Y.lipolyticaCAG79319.1 YALIOE09284p, Y.lipolyticaCAG79387.1 YALIOE10813p, Y.lipolyticaCAG79616.1 YALIOE16478p, Y.lipolyticaCAG79657.1 YALIOE17457p, Y.lipolyticaCAG80039.1 YALIOE26785p, Y.lipolyticaCAG80102.1 YALIOE28270p, Y.lipolyticaCAG80328.1 YALIOE33341p, Y.lipolyticaCAG80521.1 YALIOD02629p, Y.lipolyticaCAG80690.1 YALIOD06798p, Y.lipolyticaCAG80752.1 YALIOD08228p, Y.lipolyticaCAG81508.1 YALIOD26147p, Y.lipolyticaCAG81658.1 YALIOC02431p, Y.lipolyticaCAG81788.1 YALIOC05753p, Y.lipolyticaCAG81805.1 YALIOC06127p, Y.lipolyticaCAG82141.2 YALIOC14498p, Y.lipolyticaCAG82322.1 YALIOC19195p, Y.lipolyticaCAG82683.1 YALIOB03344p, Y.lipolyticaCAG82778.1 YALIOB05852p, Y.lipolyticaCAG83442.1 YALIOB21604p, Y.lipolyticaCAG83882.1 YALIOA10659p, Y.lipolyticaCAG84078.1 YALIOA16863p, Y.lipolyticaCAG84248.1 YALIOA20944p, Y.lipolyticaCAG84250.1 YALIOA20988p                                                                                                                                                                                                                                                                                                                                                                                                                                                                                                                                                     |
| <b>Trypanosoma cruzi CL Brener TC3 SLC25s:</b> Tca1.4571.m00013 Tc00.1047053503425.5 Tc00.1047053503425.5, Tca1.4619.m00031 Tc00.1047053503521.39 Tc00.1047053503521.39, Tca1.4807.m00017 Tc00.1047053503897.170 Tc00.1047053503897.170, Tca1.4828.m00002 Tc00.1047053503939.20 Tc00.1047053503939.20, Tca1.4875.m00009 Tc00.1047053504033.90 Tc00.1047053504033.90, Tca1.4887.m00014 Tc00.1047053504057.140 Tc00.1047053504057.140, Tca1.4913.m00007 Tc00.1047053504109.70 Tc00.1047053504109.70, Tca1.4921.m00005 Tc00.1047053504125.50 Tc00.1047053504125.50, Tca1.4924.m00019 Tc00.1047053504131.190 Tc00.1047053504131.190, Tca1.4967.m00012 Tc00.1047053504217.19 Tc00.1047053504217.19, Tca1.5360.m00007 Tc00.1047053506359.70 Tc00.1047053506359.70, Tca1.5738.m00003 Tc00.1047053509551.30 Tc00.1047053509551.30, Tca1.5889.m00002 Tc00.1047053510315.20 Tc00.1047053510315.20, Tca1.5966.m00034 Tc00.1047053510663.64 Tc00.1047053510663.64, Tca1.6711.m00025 Tc00.1047053505807.250 Tc00.1047053505807.250, Tca1.6853.m00016                                                                                                                                                                                                                                                                                                                                                                                                                                                                                                                                                                                                                                                                                                                                                                                                                                                                                                      |



|                                                                                                                                                                                                                                                                                                                                                                                                                                                                                                                                                                                                                                                                                                                                                                                                                                                                                                                                                                                                                                                                                                                                                                                                                                                                                                                                                                                                                                                                                                                                                                                                                                                                                                                                                                                                                                                                                                                                                                                                                                                                                                                                                                                                                                                                         |
|-------------------------------------------------------------------------------------------------------------------------------------------------------------------------------------------------------------------------------------------------------------------------------------------------------------------------------------------------------------------------------------------------------------------------------------------------------------------------------------------------------------------------------------------------------------------------------------------------------------------------------------------------------------------------------------------------------------------------------------------------------------------------------------------------------------------------------------------------------------------------------------------------------------------------------------------------------------------------------------------------------------------------------------------------------------------------------------------------------------------------------------------------------------------------------------------------------------------------------------------------------------------------------------------------------------------------------------------------------------------------------------------------------------------------------------------------------------------------------------------------------------------------------------------------------------------------------------------------------------------------------------------------------------------------------------------------------------------------------------------------------------------------------------------------------------------------------------------------------------------------------------------------------------------------------------------------------------------------------------------------------------------------------------------------------------------------------------------------------------------------------------------------------------------------------------------------------------------------------------------------------------------------|
| Tc00.1047053506211.160 Tc00.1047053506211.160, Tca1.6857.m00004 Tc00.1047053506221.40 Tc00.1047053506221.40, Tca1.6869.m00026 Tc00.1047053506247.260 Tc00.1047053506247.260, Tca1.6869.m00036 Tc00.1047053506247.360 Tc00.1047053506247.360, Tca1.6930.m00178 Tc00.1047053506401.304 Tc00.1047053506401.304, Tca1.6985.m00013 Tc00.1047053506525.130 Tc00.1047053506525.130, Tca1.7076.m00008 Tc00.1047053506739.80 Tc00.1047053506739.80, Tca1.7083.m00131 Tc00.1047053506755.74 Tc00.1047053506755.74, Tca1.7090.m00010 Tc00.1047053506771.18 Tc00.1047053506771.18, Tca1.7161.m00002 Tc00.1047053506979.20 Tc00.1047053506979.20, Tca1.7175.m00010 Tc00.1047053507017.100 Tc00.1047053507017.100, Tca1.7617.m00063 Tc00.1047053508153.630 Tc00.1047053508153.630, Tca1.7739.m00307 Tc00.1047053508461.284 Tc00.1047053508461.284, Tca1.7818.m00017 Tc00.1047053508659.18 Tc00.1047053508659.18, Tca1.7851.m00015 Tc00.1047053508737.150 Tc00.1047053508737.150, Tca1.7953.m00002 Tc00.1047053508989.20 Tc00.1047053508989.20, Tca1.8002.m00086 Tc00.1047053509109.114 Tc00.1047053509109.114, Tca1.8008.m00005 Tc00.1047053509127.50 Tc00.1047053509127.50, Tca1.8133.m00003 Tc00.1047053509561.30 Tc00.1047053509561.30, Tca1.8134.m00011 Tc00.1047053509569.110 Tc00.1047053509569.110, Tca1.8197.m00009 Tc00.1047053509769.90 Tc00.1047053509769.90, Tca1.8208.m00019 Tc00.1047053509805.190 Tc00.1047053509805.190, Tca1.8356.m00016 Tc00.1047053510291.14 Tc00.1047053510291.14, Tca1.8366.m00046 Tc00.1047053510339.74 Tc00.1047053510339.74, Tca1.8370.m00386 Tc00.1047053510359.69 Tc00.1047053510359.69, Tca1.8443.m00009 Tc00.1047053510603.90 Tc00.1047053510603.90, Tca1.8479.m00003 Tc00.1047053510737.30 Tc00.1047053510737.30, Tca1.8508.m00010 Tc00.1047053510819.100 Tc00.1047053510819.100, Tca1.8515.m00030 Tc00.1047053510835.24 Tc00.1047053510835.24, Tca1.8634.m00001 Tc00.1047053511249.10 Tc00.1047053511249.10, Tca1.8646.m00166 Tc00.1047053511283.124 Tc00.1047053511283.124, Tca1.8647.m00007 Tc00.1047053511289.70 Tc00.1047053511289.70, Tca1.8672.m00008 Tc00.1047053511365.80 Tc00.1047053511365.80, Tca1.8765.m00014 Tc00.1047053511725.140 Tc00.1047053511725.140, Tca1.8765.m00126 Tc00.1047053511725.134 Tc00.1047053511725.134 |
| <b>Oryza sativa SLC25A44:</b> XP_015622257.1                                                                                                                                                                                                                                                                                                                                                                                                                                                                                                                                                                                                                                                                                                                                                                                                                                                                                                                                                                                                                                                                                                                                                                                                                                                                                                                                                                                                                                                                                                                                                                                                                                                                                                                                                                                                                                                                                                                                                                                                                                                                                                                                                                                                                            |
| <b>Vitis vinifera SLC25A44 isoform 1:</b> XP_010660573.1                                                                                                                                                                                                                                                                                                                                                                                                                                                                                                                                                                                                                                                                                                                                                                                                                                                                                                                                                                                                                                                                                                                                                                                                                                                                                                                                                                                                                                                                                                                                                                                                                                                                                                                                                                                                                                                                                                                                                                                                                                                                                                                                                                                                                |
| <b>Vitis vinifera SLC25A44 isoform 2:</b> LOC100254860; XP_003633751.1                                                                                                                                                                                                                                                                                                                                                                                                                                                                                                                                                                                                                                                                                                                                                                                                                                                                                                                                                                                                                                                                                                                                                                                                                                                                                                                                                                                                                                                                                                                                                                                                                                                                                                                                                                                                                                                                                                                                                                                                                                                                                                                                                                                                  |
| <b>Vitis vinifera SLC25A44 isoform 3:</b> XP_010660574.1                                                                                                                                                                                                                                                                                                                                                                                                                                                                                                                                                                                                                                                                                                                                                                                                                                                                                                                                                                                                                                                                                                                                                                                                                                                                                                                                                                                                                                                                                                                                                                                                                                                                                                                                                                                                                                                                                                                                                                                                                                                                                                                                                                                                                |
| <b>Vitis vinifera SLC25A44 isoform 4:</b> XP_010660575.1                                                                                                                                                                                                                                                                                                                                                                                                                                                                                                                                                                                                                                                                                                                                                                                                                                                                                                                                                                                                                                                                                                                                                                                                                                                                                                                                                                                                                                                                                                                                                                                                                                                                                                                                                                                                                                                                                                                                                                                                                                                                                                                                                                                                                |
| <b>Chlamydomonas reinhardtii SLC25A44:</b> XP_001701982.1                                                                                                                                                                                                                                                                                                                                                                                                                                                                                                                                                                                                                                                                                                                                                                                                                                                                                                                                                                                                                                                                                                                                                                                                                                                                                                                                                                                                                                                                                                                                                                                                                                                                                                                                                                                                                                                                                                                                                                                                                                                                                                                                                                                                               |
| <b>Chlamydomonas reinhardtii SLC25A44:</b> PNW86570.1                                                                                                                                                                                                                                                                                                                                                                                                                                                                                                                                                                                                                                                                                                                                                                                                                                                                                                                                                                                                                                                                                                                                                                                                                                                                                                                                                                                                                                                                                                                                                                                                                                                                                                                                                                                                                                                                                                                                                                                                                                                                                                                                                                                                                   |
| <b>Ostreococcus tauri SLC25A44:</b> XP_003081262.2                                                                                                                                                                                                                                                                                                                                                                                                                                                                                                                                                                                                                                                                                                                                                                                                                                                                                                                                                                                                                                                                                                                                                                                                                                                                                                                                                                                                                                                                                                                                                                                                                                                                                                                                                                                                                                                                                                                                                                                                                                                                                                                                                                                                                      |
| <b>Gorilla gorilla gorilla SLC25A44:</b> XP_018879898.1                                                                                                                                                                                                                                                                                                                                                                                                                                                                                                                                                                                                                                                                                                                                                                                                                                                                                                                                                                                                                                                                                                                                                                                                                                                                                                                                                                                                                                                                                                                                                                                                                                                                                                                                                                                                                                                                                                                                                                                                                                                                                                                                                                                                                 |
| <b>Mus musculus SLC25A44:</b> NP_001139348.1                                                                                                                                                                                                                                                                                                                                                                                                                                                                                                                                                                                                                                                                                                                                                                                                                                                                                                                                                                                                                                                                                                                                                                                                                                                                                                                                                                                                                                                                                                                                                                                                                                                                                                                                                                                                                                                                                                                                                                                                                                                                                                                                                                                                                            |
| <b>Bos taurus SLC25A44:</b> NP_001071325.1                                                                                                                                                                                                                                                                                                                                                                                                                                                                                                                                                                                                                                                                                                                                                                                                                                                                                                                                                                                                                                                                                                                                                                                                                                                                                                                                                                                                                                                                                                                                                                                                                                                                                                                                                                                                                                                                                                                                                                                                                                                                                                                                                                                                                              |
| <b>Drosophila melanogaster SLC25A44 (Dmel_CG5805):</b> NP_001287513.1                                                                                                                                                                                                                                                                                                                                                                                                                                                                                                                                                                                                                                                                                                                                                                                                                                                                                                                                                                                                                                                                                                                                                                                                                                                                                                                                                                                                                                                                                                                                                                                                                                                                                                                                                                                                                                                                                                                                                                                                                                                                                                                                                                                                   |
| <b>Halyomorpha halys SLC25A44:</b> XP_014285646.1                                                                                                                                                                                                                                                                                                                                                                                                                                                                                                                                                                                                                                                                                                                                                                                                                                                                                                                                                                                                                                                                                                                                                                                                                                                                                                                                                                                                                                                                                                                                                                                                                                                                                                                                                                                                                                                                                                                                                                                                                                                                                                                                                                                                                       |
| <b>Rhincodon typus SLC25A44:</b> XP_020377155.1                                                                                                                                                                                                                                                                                                                                                                                                                                                                                                                                                                                                                                                                                                                                                                                                                                                                                                                                                                                                                                                                                                                                                                                                                                                                                                                                                                                                                                                                                                                                                                                                                                                                                                                                                                                                                                                                                                                                                                                                                                                                                                                                                                                                                         |
| <b>Cimex lectularius SLC25A44:</b> XP_014241248.1                                                                                                                                                                                                                                                                                                                                                                                                                                                                                                                                                                                                                                                                                                                                                                                                                                                                                                                                                                                                                                                                                                                                                                                                                                                                                                                                                                                                                                                                                                                                                                                                                                                                                                                                                                                                                                                                                                                                                                                                                                                                                                                                                                                                                       |
| <b>Pangasianodon hypophthalmus SLC25A44:</b> XP_026793239.1                                                                                                                                                                                                                                                                                                                                                                                                                                                                                                                                                                                                                                                                                                                                                                                                                                                                                                                                                                                                                                                                                                                                                                                                                                                                                                                                                                                                                                                                                                                                                                                                                                                                                                                                                                                                                                                                                                                                                                                                                                                                                                                                                                                                             |
| <b>Sinocyclocheilus rhinoceros SLC25A44:</b> XP_016396502.1                                                                                                                                                                                                                                                                                                                                                                                                                                                                                                                                                                                                                                                                                                                                                                                                                                                                                                                                                                                                                                                                                                                                                                                                                                                                                                                                                                                                                                                                                                                                                                                                                                                                                                                                                                                                                                                                                                                                                                                                                                                                                                                                                                                                             |
| <b>Boleophthalmus pectinirostris SLC25A44:</b> XP_020773135.1                                                                                                                                                                                                                                                                                                                                                                                                                                                                                                                                                                                                                                                                                                                                                                                                                                                                                                                                                                                                                                                                                                                                                                                                                                                                                                                                                                                                                                                                                                                                                                                                                                                                                                                                                                                                                                                                                                                                                                                                                                                                                                                                                                                                           |
| <b>Saccoglossus kowalevskii SLC25A44:</b> XP_006815419.1                                                                                                                                                                                                                                                                                                                                                                                                                                                                                                                                                                                                                                                                                                                                                                                                                                                                                                                                                                                                                                                                                                                                                                                                                                                                                                                                                                                                                                                                                                                                                                                                                                                                                                                                                                                                                                                                                                                                                                                                                                                                                                                                                                                                                |
| <b>Strongylocentrotus purpuratus SLC25A44:</b> XP_782479.3                                                                                                                                                                                                                                                                                                                                                                                                                                                                                                                                                                                                                                                                                                                                                                                                                                                                                                                                                                                                                                                                                                                                                                                                                                                                                                                                                                                                                                                                                                                                                                                                                                                                                                                                                                                                                                                                                                                                                                                                                                                                                                                                                                                                              |
| <b>Dendronephthya gigantea SLC25A44:</b> XP_028399431.1                                                                                                                                                                                                                                                                                                                                                                                                                                                                                                                                                                                                                                                                                                                                                                                                                                                                                                                                                                                                                                                                                                                                                                                                                                                                                                                                                                                                                                                                                                                                                                                                                                                                                                                                                                                                                                                                                                                                                                                                                                                                                                                                                                                                                 |
| <b>Orbicella faveolata SLC25A44:</b> XP_020616140.1                                                                                                                                                                                                                                                                                                                                                                                                                                                                                                                                                                                                                                                                                                                                                                                                                                                                                                                                                                                                                                                                                                                                                                                                                                                                                                                                                                                                                                                                                                                                                                                                                                                                                                                                                                                                                                                                                                                                                                                                                                                                                                                                                                                                                     |
| <b>Nematostella vectensis SLC25A44:</b> XP_001634420.1                                                                                                                                                                                                                                                                                                                                                                                                                                                                                                                                                                                                                                                                                                                                                                                                                                                                                                                                                                                                                                                                                                                                                                                                                                                                                                                                                                                                                                                                                                                                                                                                                                                                                                                                                                                                                                                                                                                                                                                                                                                                                                                                                                                                                  |
| <b>Pocillopora damicornis SLC25A44:</b> XP_027039995.1                                                                                                                                                                                                                                                                                                                                                                                                                                                                                                                                                                                                                                                                                                                                                                                                                                                                                                                                                                                                                                                                                                                                                                                                                                                                                                                                                                                                                                                                                                                                                                                                                                                                                                                                                                                                                                                                                                                                                                                                                                                                                                                                                                                                                  |
| <b>Stylophora pistillata SLC25A44:</b> XP_022800183.1                                                                                                                                                                                                                                                                                                                                                                                                                                                                                                                                                                                                                                                                                                                                                                                                                                                                                                                                                                                                                                                                                                                                                                                                                                                                                                                                                                                                                                                                                                                                                                                                                                                                                                                                                                                                                                                                                                                                                                                                                                                                                                                                                                                                                   |
| <b>Exaiptasia pallida SLC25A44:</b> XP_020901668.1                                                                                                                                                                                                                                                                                                                                                                                                                                                                                                                                                                                                                                                                                                                                                                                                                                                                                                                                                                                                                                                                                                                                                                                                                                                                                                                                                                                                                                                                                                                                                                                                                                                                                                                                                                                                                                                                                                                                                                                                                                                                                                                                                                                                                      |
| <b>Neorickettsia sennetsu strMiyayama SLC25:</b> Nse_0925 YP_506789.1                                                                                                                                                                                                                                                                                                                                                                                                                                                                                                                                                                                                                                                                                                                                                                                                                                                                                                                                                                                                                                                                                                                                                                                                                                                                                                                                                                                                                                                                                                                                                                                                                                                                                                                                                                                                                                                                                                                                                                                                                                                                                                                                                                                                   |
| <b>Neorickettsia sennetsu strMiyayama SLC25:</b> Nse_0926 YP_003082092.1                                                                                                                                                                                                                                                                                                                                                                                                                                                                                                                                                                                                                                                                                                                                                                                                                                                                                                                                                                                                                                                                                                                                                                                                                                                                                                                                                                                                                                                                                                                                                                                                                                                                                                                                                                                                                                                                                                                                                                                                                                                                                                                                                                                                |
| <b>Butyrivibrio proteoclasticus B316 SLC25:</b> Bpr_1014 YP_003213425.1                                                                                                                                                                                                                                                                                                                                                                                                                                                                                                                                                                                                                                                                                                                                                                                                                                                                                                                                                                                                                                                                                                                                                                                                                                                                                                                                                                                                                                                                                                                                                                                                                                                                                                                                                                                                                                                                                                                                                                                                                                                                                                                                                                                                 |
| <b>Neorickettsia risticii strIllinois SLC25:</b> Nri_0889 YP_506790.1                                                                                                                                                                                                                                                                                                                                                                                                                                                                                                                                                                                                                                                                                                                                                                                                                                                                                                                                                                                                                                                                                                                                                                                                                                                                                                                                                                                                                                                                                                                                                                                                                                                                                                                                                                                                                                                                                                                                                                                                                                                                                                                                                                                                   |
| <b>Cardinium endosymbiont cEper1 of Encarsia pergandiella SLC25:</b> Cahe_0788 YP_506789.1                                                                                                                                                                                                                                                                                                                                                                                                                                                                                                                                                                                                                                                                                                                                                                                                                                                                                                                                                                                                                                                                                                                                                                                                                                                                                                                                                                                                                                                                                                                                                                                                                                                                                                                                                                                                                                                                                                                                                                                                                                                                                                                                                                              |
| <b>Acidaminococcus intestini RyCMR95 SLC25:</b> Acin_0746 YP_001086859.1                                                                                                                                                                                                                                                                                                                                                                                                                                                                                                                                                                                                                                                                                                                                                                                                                                                                                                                                                                                                                                                                                                                                                                                                                                                                                                                                                                                                                                                                                                                                                                                                                                                                                                                                                                                                                                                                                                                                                                                                                                                                                                                                                                                                |

### Extended Data Table 3: Polymorphism of the rice and mouse *Slc25A44* genes

|                                                    | Total variations                  | Variations in coding regions | Missense variations                                                                                                                                                                                                        |
|----------------------------------------------------|-----------------------------------|------------------------------|----------------------------------------------------------------------------------------------------------------------------------------------------------------------------------------------------------------------------|
| <b>Rice</b><br><b><i>Slc25A44</i><sup>1</sup></b>  | <b>75</b>                         | <b>8</b>                     | <b>3 missenses:</b><br>_Ser211Ala<br>_Met198Ile ( <i>Arabidopsis</i> , <i>Arachis</i> , and grape SLC25A44s have Val or Ala at this position)<br>_Leu187Ile (Grape has also Ile at this position in all the four isoforms) |
| <b>Mouse</b><br><b><i>Slc25A44</i><sup>2</sup></b> | <b>61 (With unknown zygosity)</b> | <b>8</b>                     | <b>1 missense:</b><br>_Val259Ile (This change can also be found among the human <i>Slc25A44</i> transcript isoforms)<br><b>1 stop-loss:</b><br>_* /RRQELHRPDLQAADGRGGALGPHEGPLGKNHL<br>GYTLHRRHRGGLREPQEAQPAT*             |

<sup>1</sup>Data was extracted from the RiceVarMap v2.0 at <http://ricevarmap.ncpgr.cn/v2/>. <sup>2</sup>Data was extracted from the Mouse Genome Database at <http://www.informatics.jax.org/>.

### Extended Data Table 4: *S. cerevisiae* strains and plasmids

| Strain    | Genotype                                               | Plasmid                      | Parent strain | Reference              |
|-----------|--------------------------------------------------------|------------------------------|---------------|------------------------|
| ST691     | <i>MATa,aro10Δ,cdc5Δ</i>                               | -                            | -             | Li et al., 2016        |
| ST7515(A) | <i>pTEF1-&gt;AtPAL2, pPGK1-&gt;AtC4H</i>               | pcfB1018 (pXI-5-LoxP-SpHIS5) | ST691         | This study             |
| ST7516(B) | <i>pPGK1-&gt;ScCYB5, pTEF1-&gt;AtATR2</i>              | pcfB0848 (pXI-2-LoxP-URA3)   | ST7515        | This study             |
| ST2645    | <i>pTEF1-&gt;ARO7, pPGK1-&gt;ARO4, pTEF1-&gt;FjTAL</i> | -                            | ST691         | Rodriguez et al., 2015 |
| ST9535    | <i>pTEF1-&gt;AdSLC25A44</i>                            | pcfB9228 (XII-2-loxP-KanMX)  | ST7516        | This study             |
| ST9351    | <i>pTEF1-&gt;HsSLC25A44</i>                            | pcfB9056 (XII-2-loxP-KanMX)  | ST7516        | This study             |
| ST9536    | <i>pTEF1-&gt;AdSLC25A44</i>                            | pcfB9228 (XII-2-loxP-KanMX)  | ST2645        | This study             |
| ST9352    | <i>pTEF1-&gt;HsSLC25A44</i>                            | pcfB9056 (XII-2-loxP-KanMX)  | ST2645        | This study             |
| ST9534    | <i>pTEF1-&gt;AdSLC25A44_GFP</i>                        | pcfB9227 (XII-2-loxP-KanMX)  | ST691         | This study             |
| ST9587    | <i>pTEF1-&gt;AdSLC25A44ΔLWW/IQF</i>                    | pcfB9263 (XII-2-loxP-KanMX)  | ST7516        | This study             |
| ST9591    | <i>pTEF1-&gt;AdSLC25A44ΔLWW/IQF</i>                    | pcfB9263 (XII-2-loxP-KanMX)  | ST2645        | This study             |



## Extended Data Table 5: Primers and templates used for cloning of the gene fragments

|                                                                                                                                                      |                                                          |          |
|------------------------------------------------------------------------------------------------------------------------------------------------------|----------------------------------------------------------|----------|
| 1. Construction of the plasmid pcfB6108 (T7->AdSlc25A44) using the parental plasmid pcfB1146 and the AdSlc25A44 BioBrick (BB4532)                    |                                                          |          |
| Amplification of the BioBrick BB4532                                                                                                                 |                                                          |          |
| Primer ID                                                                                                                                            | primer sequence                                          | Template |
| PR23786 (F-SLC25A44)                                                                                                                                 | GGCTTAAUATGGCAATGGAAGCTGCTGAGGCTTCA                      | pcfB6095 |
| PR23787 (R-SLC25A44)                                                                                                                                 | GGTTTAAUTTAAGCCACAGACCTCAAACCTGGCTGAACTGACAA             |          |
| Amplification of the AdSlc25A44 cassette to be used for in-vitro transcription                                                                       |                                                          |          |
| Primer ID                                                                                                                                            | primer sequence                                          | Template |
| PR23809 (F.cassette)                                                                                                                                 | GTGCTGCAAGGCGATTAAGTTGGGTAACGC                           | pcfB6108 |
| PR23810 (R.cassette)                                                                                                                                 | CCTCGAGGCGGCCGCTGCAG                                     |          |
| 2. Construction of the yeast integrative plasmid pcfB9228 (TEF->AdSlc25A44) using the parental plasmid pcfB2225 and the AdSlc25A44 BioBrick (BB4533) |                                                          |          |
| Amplification of the BioBrick BB4533                                                                                                                 |                                                          |          |
| Primer ID                                                                                                                                            | primer sequence                                          | Template |
| PR21569 (F-SLC25A44)                                                                                                                                 | ATCTGTCAUAAAACAATGGCAATGGAAGCTGCTGAGGCTTCA               | pcfB6108 |
| PR21570 (R-SLC25A44)                                                                                                                                 | ATGATGTTUAGCCACAGACCTCAAACCTGGCTGAACTGACA                |          |
| 3. Construction of the yeast integrative plasmid pcfB9056 (TEF->HsSlc25A44) using the parental plasmid pcfB2225 and the HsSlc25A44 BioBrick (BB4534) |                                                          |          |
| Amplification of the BioBrick BB4534                                                                                                                 |                                                          |          |
| Primer ID                                                                                                                                            | primer sequence                                          | Template |
| PR24665 (F-SLC25A44)                                                                                                                                 | ATCTGTCAUAAAACAATGGAAGACAAAAGAAACATCCAGATCATCGAGTGGGAA   | pcfB9038 |
| PR24666 (R-SLC25A44)                                                                                                                                 | ACGCGATUTACCAATGTCTGGAGTCCACCAGCTCAGGTCGA                |          |
| Amplification of the pcfB2225                                                                                                                        |                                                          |          |
| Primer ID                                                                                                                                            | primer sequence                                          | Template |
| PR24663 (P2225-Tef.R)                                                                                                                                | ATGACAGAUTTGTAATTAACCTAGATTAGATTGCTATGCTTTCTTCTAATGAGCAA | pcfB2225 |
| PR24664 (P2225.R)                                                                                                                                    | AATCGCGUGCATTCTCCGCTCTAACCGAAA                           |          |
| 4. Construction of the plasmid pcfB9227 (TEF->AdSlc25A44-Gfp) using the parental plasmid pcfB9228 and the Gfp BioBrick (BB4535)                      |                                                          |          |
| Amplification of the BioBrick BB4535                                                                                                                 |                                                          |          |
| Primer ID                                                                                                                                            | primer sequence                                          | Template |
| PR24222                                                                                                                                              | AATATGTCUAAAGGTGAAGAATTATTCACTGGTGTGTCCCAAT              | pcfB5286 |
| PR24223                                                                                                                                              | ATGATGTTUTTTGTACAATTCATCCATACCATGGGTAATACCAGCAGCAGTA     |          |
| Amplification of the pcfB9228                                                                                                                        |                                                          |          |
| Primer ID                                                                                                                                            | primer sequence                                          | Template |
| PR25396                                                                                                                                              | AAACATCAUTAAATCGCGTGCATTCTCCGCTCTAACCGAAAAGGA            | pcfB9228 |
| PR24225                                                                                                                                              | AGACATATUAGCCACAGACCTCAAACCTGGCTGAACTGACAATCTCTTAATCA    |          |
| 5. Construction of the plasmid pcfB9263 (TEF->AdSlc25A44ΔLWW/IQF) using the parental plasmid pcfB9228                                                |                                                          |          |
| Amplification of the pcfB9228                                                                                                                        |                                                          |          |
| Primer ID                                                                                                                                            | primer sequence                                          | Template |
| PR25078                                                                                                                                              | AATTCGGTUCATATGGCGCCGCTCAGCACATCATTTGGA                  | pcfB9228 |
| PR25079                                                                                                                                              | AACCGAATUGAATTGCAGATGCAGGTGACTGAGTAATGGCTGTCTAGTCCAAA    |          |

**Extended Data Table 6: Primers used for the screening of gene-integration into the genomes of yeast strains**

| Site  | Primer ID | Sequence of the primer 5'-3' | Description | Fragment size (bp) |
|-------|-----------|------------------------------|-------------|--------------------|
| XII-2 | 2220      | CCTGCAGGACTAGTGCTGAG         | XII-2 DOWN  | 666                |
|       | 894       | GGCCCTGATAAGGTTGTTG          |             |                    |
|       | 2221      | GTTGACACTTCTAAATAAGCGAATTTTC | XII-2 UP    | 795                |
|       | 893       | CGAAGAAGGCCTGCAATTC          |             |                    |
| XI-2  | 2220      | CCTGCAGGACTAGTGCTGAG         | XI-2 DOWN   | 818                |
|       | 910       | GAGACAAGATGGGGCAAGAC         |             |                    |
|       | 2221      | GTTGACACTTCTAAATAAGCGAATTTTC | XI-2 UP     | 963                |
|       | 909       | GTTTGTAGTTGGCGGTGGAG         |             |                    |
| XI-5  | 2220      | CCTGCAGGACTAGTGCTGAG         | XI-5 DOWN   | 701                |
|       | 8419      | GCATGGTCACCGCTATCAGC         |             |                    |
|       | 2221      | GTTGACACTTCTAAATAAGCGAATTTTC | XI-5 UP     | 1050               |
|       | 8418      | CTCAATGATCAAAATCCTGAATGCA    |             |                    |
